# The Distribution of Enset Pests and Pathogens and a Genomic Survey of Enset Xanthomonas Wilt

Zerihun Yemataw<sup>1†</sup>, James S. Borrell<sup>2†\*</sup>, Manosh Kumar Biswas<sup>3</sup>, Oliver White<sup>2</sup>,  
Wendawek Mengesha<sup>4</sup>, Sadik Muzemil<sup>1,5</sup>, Jaypal N. Darbar<sup>3</sup>, Ian Ondo<sup>2</sup>, Pat J.S.  
Heslop Harrison<sup>3</sup>, Guy Blomme<sup>6</sup>, Paul Wilkin<sup>2</sup>

<sup>†</sup>Joint first authors

**\*Corresponding author:** J. S. Borrell; E-mail: [J.borrell@kew.org](mailto:J.borrell@kew.org)

<sup>1</sup>Southern Agricultural Research Institute, Hawassa, Southern Nations Nationalities and Peoples Regional State, Ethiopia.

<sup>2</sup>Department of Natural Capital and Plant Health, Royal Botanic Gardens, Kew, Richmond, Surrey, TW9 3AE, UK

<sup>3</sup>Department of Genetics and Genome Biology, University of Leicester, LR1 7RH, UK

<sup>4</sup>Department of Biology, Hawassa University, Hawassa, Ethiopia

<sup>5</sup>School of Life Sciences, University of Warwick, Coventry CV4 7AL, UK

<sup>6</sup>Bioversity International, Addis Ababa office, c/o ILRI, P.O. Box 5689, Addis Ababa, Ethiopia

**Keywords:** Bacterial wilt, Enset Xanthomonas Wilt, food security, plant health, root mealybug, Xanthomonas Wilt of enset

# Abstract

Mapping the distribution of crop pests and pathogens is essential to safeguard food security and sustainable livelihoods. However, these data are unavailable for many neglected and underutilised crops, particularly in developing countries. In Ethiopia, the world's largest historic recipient of food aid, the indigenous banana relative enset (*Ensete ventricosum*) is threatened by multiple pests and pathogens whilst providing the staple starch source for 20 million people. Foremost among these is *Xanthomonas* Wilt of enset (EXW), caused by *Xanthomonas vasicola* pv. *musacearum* (*Xvm*), a globally important disease of bananas (*Musa* sp.) that likely originated in enset. Here we collate 1069 farm surveys to map the distribution and relative prevalence of enset pests and pathogens across the entire enset growing region. We find that EXW is the most frequently encountered pathogen, and that farmers consistently ranked EXW as the most significant constraint on enset agriculture. Our surveys also showed that corm rot, and the pests root mealybug, mole rat and porcupine are all virtually ubiquitous. Finally, we apply genotyping-by-sequencing to the detection of *Xvm* and demonstrate that it is present even in asymptomatic domesticated and wild enset samples, suggesting that management of plants displaying symptoms alone may not be sufficient to reduce disease transmission. Holistic understanding of pests and pathogen distributions in enset may have significant benefits for both food security in Ethiopia, and preventing proliferation in related crops such as banana across central and east Africa.

# Introduction

The increasing transmission of plant pests and pathogens has significant consequences for the distribution, quality and yield of crops (Bebber et al. 2014; Savary et al. 2019). Rural subsistence farmers appear particularly susceptible to these impacts, where emergence or outbreaks of pests and pathogens exacerbates existing food insecurity (Bruce 2010; Vurro et al. 2010) or hinders agricultural resilience (Heeb et al. 2019). Whilst global surveillance systems exist for pest and pathogens of major crops (Forum et al. 2019), basic distribution, prevalence and incidence data is missing for many neglected and underutilized plants which are likely to become increasingly important in future diversified food systems (Borrell et al. 2019).

This paucity of monitoring data is a major challenge in Ethiopia where enset (*Ensete ventricosum* (Welw.) Cheesman), an indigenous banana relative, provides food security for 20 million people, but is threatened by multiple poorly documented pests and pathogens (Jones 2000, 2018; Blomme et al. 2017; Borrell et al. 2019). Enset cultivation is largely restricted to south and southwest Ethiopia (Figure 1A) where it is grown principally as a subsistence crop and for regional markets, and often comprises a significant proportion of total farm area (Borrell et al. 2020; Sahle et al. 2018). Enset is a monocarpic perennial that can grow for up to a decade before reaching maturity and is readily vegetatively propagated. Farmers maintain a cycle of plantings and transplantings of various ages that can be harvested at any time prior to flowering and senescence. Following harvest, the pseudostem and corm are pulped and fermented to provide a storable starch source (Tamrat et al. 2020). This flexible system enables farmers to buffer

seasonal food deficits, earning enset the moniker ‘the tree against hunger’ (Brandt et al. 1997).

Enset production is affected by multiple pests and pathogens of varying severity (Table 1, Figure 1). Important biotic constraints include Enset *Xanthomonas* Wilt (EXW, bacterial rots (*Erwinia* sp.) and root mealybugs (Blomme et al. 2017; Bogale et al. 2004; Addis, Azerefegne, Blomme, et al. 2008; Tewodros and Tesfaye 2014; Shank and Ertiro 1996). EXW is caused by *Xanthomonas vasicola* pv. *musacearum* (*Xvm*) (formerly *X. campestris* pv. *musacearum*). For clarity, in this manuscript we follow Studholme et al., 2019 and refer to the causal organism as *X. vasicola* pv. *musacearum*, except when discussing NCBI the reference genome which is still accessioned as *X. campestris* pv. *musacearum*. Mammal pests that directly damage the plants include porcupine, mole rats, wild pigs and monkeys (Bobosha 2003), and these are also suspected vectors of disease transmission, especially EXW, hence they are included in this study (Hunduma et al. 2015; Pers. Obs. J.S. Borrell).

Among these pests and pathogens, EXW is frequently cited as the most significant concern for farmers, generating a large number of studies that seek to identify tolerant or resistant enset landraces (Hunduma et al. 2015; G Welde-Michael et al. 2008; Yemataw et al. 2016; Muzemil et al. 2020; Haile et al. 2020) *Xvm* infects the vascular system of enset, damaging the harvestable tissue, causing permanent wilting and eventually death (Yemataw et al. 2017). It is known to be transmitted by contaminated tools and infected planting material, and potentially biotic vectors, such as wild and domesticated animals that browse part of the corm or pseudostem (Yemataw et al. 2017; Addis et al. 2010). In a previous study across 320 farms in eight districts, 40% of respondents reported EXW in

their field (McKnight-CCRP 2013), though this varied by region from 3.3% (Kembata Tembaro) to 95.7% (Gedeo), and the authors suggest that the true infection rate (farm prevalence) could be as high as 80%. Some authors claim that EXW has forced farmers to abandon enset production (Spring 1996; Tadesse et al. 2003). EXW is also speculated to be a possible driver for a reported major historic decline in enset agriculture in the North of Ethiopia (~200 years b.p.), though there is a lack of evidence to support or refute this (Brandt et al. 1997).

The causative agent of EXW was first described by Yirgou and Bradbury (1968) in Ethiopia. However symptoms consistent with EXW were reported as early as the 1930s (Castellani 1939; Studholme et al. 2019; Blomme et al. 2017), though it is not clear whether this represents emergence of the disease, or simply the first scientific documentation. During the 1960-80s the pathogen spread rapidly in enset and banana (*Musa* sp.) in Ethiopia (Yemataw et al. 2017) and is now a threat to smallholder banana cultivation throughout central and eastern Africa (Carter et al. 2010), impacting food security and rural livelihoods (Blomme et al. 2013, 2017). As a result, improved understanding of *Xvm*'s spatial distribution, intensity and impact on farmers is key to continued food security, as well as supporting translational research in enset and bananas (Merga et al. 2019). Two previous studies surveyed banana *Xanthomonas* wilt (BXW) in the East African highlands (not including Ethiopia) (Bouwmeester et al. 2016) and the risk of BXW more widely across Africa (Ocimati et al. 2019), but not at a resolution that is informative for disease mapping or management in Ethiopia, the putative origin of the disease.

Compared with *Xvm*/EXW, the distribution, prevalence and impact of other enset pests and pathogens has received much less attention. Enset corm rot is thought to be caused by *Erwinia* (or *Dickeya*) species (Blomme et al. 2017), but is poorly characterised. A survey by Yirgu (2016) in the Gamo Highlands found that a quarter of respondents considered corm rot to be the most severe disease of enset. Enset root mealybug (*Cataenococcus ensete* Williams and Matile-Ferrero) is known to be a locally important pest, with evidence that infestation retards growth, reduces pseudostem circumference and associated yields (Addis et al. 2008; Azerefegne et al. 2009). Addis (2005) reported that 30% of sampled farms were infected. Limited surveys of nematodes and weevils were undertaken by Bogale et al. (2004), which found relatively low nematode densities and did not find weevils. The banana weevil *Cosmopolites sordidus* does not thrive well above 1,600 m asl (Lescot 1988), and most enset cultivation zones are located at higher altitudes. Leaf hopper was found to be widespread in Yem special district, and associated with EXW prevalence (Zerfu et al. 2018). There remains the possibility of additional undescribed pathogens, in both wild and domesticated populations.

Here, we apply spatial and molecular methods to undertake the most extensive survey to date of the pests and pathogens affecting enset agriculture in Ethiopia, with a particular focus on detecting EXW. To achieve this, we first use region-wide farmer interviews and farm surveys to evaluate the relative abundance of pests and pathogens on enset farms, and farmer perceptions of the major constraints on enset agriculture. Second, we collate a suite of high-resolution environmental, topographic and socioeconomic variables for the study area and apply these to characterise the spatial distribution and prevalence of major enset pests and pathogens across the enset growing region. Finally, we apply a

genotyping-by-sequence approach to survey the leaf-associated microbiota of EXW-symptomatic and non-symptomatic enset samples, to assess detection efficacy of diseased versus incubating or asymptomatic *Xvm* and improve our understanding of EXW transmission. We discuss these data in the context of ongoing monitoring of pests and pathogens in a neglected food security crop, to support diagnosis, monitoring and management.

## Materials and Methods

### Enset pests and pathogen surveys

This study comprises observations from two region-wide surveys, conducted independently by i) the Southern Agricultural Research Institute between 2014-17 (n=585), hereafter SARI and ii) a team from Royal Botanic Gardens Kew, Wolkite and Hawassa Universities 2017-20 (n=484), hereafter KWH. Both surveys were independently conceived, designed and carried out over a broadly similar geographic area (Figure 2A), using a similar methodology and as a result we are confident that comparing and combining these data make our conclusions more robust.

Both surveys were conducted by experienced teams together with local agricultural extension agents, and randomly selected individual farms over stratified sampling regions. Data was collected via individual interviews and direct on-farm participatory observations, and all diseases scored as presence or absence. Both surveys recorded the presence of five major pests and pathogens: EXW, root mealybug, corm rot, mole rat and porcupine, as well as estimating the number of enset plants with symptoms of EXW. The SARI survey additionally recorded leaf hoppers and wild pig damage, and asked

farmers to identify the most important constraint on enset production. The KWH survey additionally recorded nematodes, leafspot, monkey damage and weevils. Survey methodologies were broadly consistent; applying semi-structured interview, disease identification sheets and visual inspection of infected or damaged plants. The order in which diseases were presented, and the diagnostic photographs shown were varied to mitigate reporting bias. We also sought to document any symptoms of similar magnitude that were not attributed to known pests and diseases.

We calculated the relative prevalence of pests and pathogens to compare consistency across surveys. Where a pest or pathogen was only recorded in one survey, we record prevalence relative to the number of farms in that survey. Due to road accessibility and logistics, surveys were conducted unevenly through the year. Therefore, these data are not sufficiently robust for assessing seasonal trends, though we provide a summary of seasonality in Supplementary Materials (Figure S1). Finally, we grouped farms based on the top five farmer perceived constraints on enset agriculture and compared these with pests and pathogens prevalence.

### **Spatial modelling of pest and pathogen prevalence**

We collated 41 high-resolution environmental, topographic and socioeconomic variables. Environmental variables were sourced from WorldClim (Fick and Hijmans 2017), ENVIREM (Title and Bemmels 2018) and CliMond (Kriticos et al. 2012), together with a 90m SRTM DEM sourced from Jarvis et al. (2008). Slope, aspect, topographic position index and terrain roughness were calculated from elevation using the ‘terrain’ function in the R package Raster (Hijmans 2017). Socioeconomic variables were derived from OpenStreetMap (OpenStreetMap contributors 2015) and Gridded Population of the World



v4 (Center for International Earth Science Information Network 2017). All variables were resampled to 250m resolution, for consistency with the high-resolution topographic variables. A full list of variables is provided in Supplementary Materials, Table S1. Despite the resilience of our chosen analysis approach to highly correlated variables, to aid subsequent interpretation we removed 26 variables with very high collinearity using the function `vifcor` in 'usdm' ( $th=0.8$ ) (Naimi 2017; Lever et al. 2017). All analyses were conducted in R software (R Core team 2019).

To build robust models, we tested a range of cluster aggregation values to group farms by distance and sample size (see validation section), selecting a maximum aggregation distance of 4000m and  $\geq 3$  surveyed farms (Supplementary Materials, Figure S2). We chose a relatively fine scale aggregation due to the high environmental heterogeneity of southwest Ethiopia. Prevalence was calculated as the proportion of farms affected within a cluster. Observation clusters with  $<3$  surveyed farms were excluded from model building. Environmental variables were then extracted for each surveyed farm, and averaged by cluster.

To characterise the climatic niche of each enset pest and pathogen we used an approach similar to that of Pironon *et al.* (2019). First, principal component analysis (PCA) was performed on 100,000 systematically sampled points representing background climatic space of the study area. In these analyses, the first two principal components summarise the variation of the 15 retained variables. Second, we computed quantiles of pest and pathogen prevalence from our survey data corresponding to the 10<sup>th</sup>, 50<sup>th</sup> and 90<sup>th</sup> percentile. To characterise the niche occupied by a given pest or pathogen we plotted an alpha hull for each degree of pest and pathogen severity using the package 'alphahull'

with an alpha value of 1.05 (Pateiro-lopez 2019). This approach visualises the most severely affected farm clusters nested within the broader climatic space of surveyed farms. Climatic space polygons were then replotted in geographical space using the R packages ‘raster’ and ‘rgeos’ (Hijmans 2017; Bivand et al. 2018).

To provide an indication of the strength of association between environmental variables and our predicted pest and pathogen niches, we randomly sampled each variable across our four overlapping prevalence polygons (0, 0.1, 0.5 and 0.9) and estimated the Kendall rank correlation coefficient. We note that we did not estimate the significance of each association, as this would be strongly influenced by the number of random samples. Finally, we used the nicheOverlap function in the R package Dismo (Hijmans et al. 2017) to estimate niche overlap between modelled pest and pathogen distributions for 0.1 and 0.9 prevalence quantiles.

## **Model validation**

We used three approaches to validate our spatial analysis. First, we performed a sensitivity analysis by varying the aggregation distance and cluster threshold size of farm surveys, then assessing the change in predicted area as a response. Second, we modelled data from each survey separately and evaluated performance by comparing predicted area. Finally, for EXW we use a generalized linear model to test the hypothesis that aggregated survey points with greater disease prevalence also display greater disease severity in the number of infected plants.

## **Diseased tissue sample collection and genotyping**

We collected leaf tissue samples from 10 enset individuals (multiple landraces), displaying EXW symptoms. This was complemented by 233 domesticated and 14 wild enset samples that did not display visible symptoms and were otherwise considered healthy. Samples were widely distributed across the study area, with a maximum of three from a single farm. Samples were principally collected for diversity analysis meaning they encompass a broad range of putatively genetically distinct landraces. Leaf tissue was silica dried, extracted using a standard CTAB protocol (Doyle & Doyle 1987), normalised and submitted to Data2Bio (IA, USA) for library preparation and tunable genotyping-by-sequencing (tGBS) following the protocol of Ott *et al.* (2017). DNA samples were digested with the restriction enzymes NspI and BfcCI/Sau3AI before being sequenced using an Ion Proton platform.

## **Identification of candidate bacterial sequences**

We screened all samples for putative bacterial sequences by implementing a local blast search (Camacho et al. 2009) against a custom database of bacterial genome sequences created using NCBI Reference Sequences (RefSeq; O’Leary et al. 2016). Specifically, we downloaded all complete bacterial genomes classified as “reference” or “representative” resulting in a dataset comprised of 3,000 assemblies (date accessed 12<sup>th</sup> June 2020; Supplementary Table 2). In addition, we included genome sequences for *Xanthomonas campestris* pv. *musacearum* (GenBank accession: GCA\_000277875.1) and *Xanthomonas vasicola* pv. *vasculorum* (GCA\_003015715.1). *Xanthomonas campestris* pv. *musacearum* was used as it is the causal agent of bacterial wilt in enset and banana which has recently been reclassified as *X. vasicola* pv. *musacearum* (Aritua et al. 2008).

*Xanthomonas vasicola* pv. *vasculorum* was included as it is a close relative of *Xvm* yet is non-pathogenic in banana (Wasukira et al. 2012).

Prior to the blast search, raw tGBS sequencing reads were quality filtered using Trimmomatic (Bolger et al. 2014). Duplicate sequences were filtered from our samples using CD-HIT (Fu et al. 2012). A blastn search of tGBS reads was performed against the custom bacterial genome refseq dataset with 10 maximum target sequences, one maximum high-scoring segment pair (HSP) and an expectation value (E) of  $1 \times 10^{-25}$ . The taxonomy of a query sequence was defined using a “best sum bitscore” approach, where the bitscores for each subject taxonomy identified are summed and the taxonomy with the greatest score is selected. Where more than one taxonomy has the greatest sum bitscore no taxonomy is defined. This avoids ambiguous assignment with multiple closely related taxa in the blast database. Our approach was adapted from the methodology of blobtools2 (Challis et al. 2020) which was not appropriate for our analyses as it does not distinguish subspecific taxonomic ranks (i.e. pathovars).

For an overview of the bacteria present in and/or on leaf tissue, we first counted sequences assigned to each genus or species in our blast dataset. Taxa were scored as present in an individual if we identified >5 matching reads for that sample. To provide a sequence-depth independent estimate, we then calculated the base pair coverage of the *X. vasicola* pv. *musacearum* genome that was identified in our blast search. To do this, overlapping blast hits for *X. vasicola* pv. *musacearum* in each sample were merged using bedr in R (R Core team 2019) and total base pair coverage was calculated. We plotted these data in putative groupings comprising diseased, non-diseased and wild samples, and applied Analysis of Variance (ANOVA) and Tukey HSD post-hoc tests to assess

differences between groups. Custom scripts used for the blast search, taxonomic identification and coverage estimation are available from [https://github.com/o-william-white/Enset\\_tGBS](https://github.com/o-william-white/Enset_tGBS).

## Results

### Farm and farmer surveys

A total of 1069 farms were assessed across two survey campaigns (Figure 2A). Overall, EXW was the most frequently recorded pest or pathogen, occurring in 41.2% of farms with porcupine (40.2%) and corm rot (37.6%) also similarly abundant (Figure 2B). In a comparison between surveys, corm rot, followed by porcupine and EXW was most frequently encountered by SARI, whereas EXW, followed by porcupine and root mealybug was most frequently encountered by HWK. Whilst the study area was largely consistent, the distribution of survey effort across months differed between surveys, with the majority of SARI survey effort in November-December and HWK in October and January-April (Supplementary Materials, Figure S1). Of 577 farmer responses, 507 (88%) reported pests and pathogens as the predominant constraint on enset agriculture (Table 2). Of the remainder, 34 respondents reported no major constraint and others cited eight additional abiotic constraints at low frequency, including drought, land shortage, frost and labour shortage. Farmer perception of the predominant constraint on enset agriculture was highly consistent with the frequency at which pest and pathogens were recorded on farms (Table 2).

### Spatial modelling of pests and pathogens

We computed the niche space for the five major pest and pathogen species with sufficient data and projected these into geographical space (Figure 3). Estimation of Kendall rank correlation coefficients between environmental variables and modelled pest and pathogen prevalence quantiles identified different suites of variables for each species (Table 3). EXW was positively associated with continentality and negatively associated with the maximum temperature of the coldest month and potential evapotranspiration (PET) of the coldest quarter. Corm rot was negatively associated with multiple PET variables and root mealybug was negatively associated with isothermality and cold quarter precipitation. Pairwise niche overlap at the 0.9 prevalence quantile was highest for EXW – porcupine and EXW – corm rot respectively (Table 4).

## Validation

We plotted the predicted area for each of the five species (at 0.5 and 0.9 disease prevalence quantiles) across a range of cluster aggregation distances and cluster minimum sizes (Supplementary Materials, Figure S3). These show that predicted areas for most species stabilize at 4000m and clusters of 3 or more farms. At very high cluster values ( $>7$ ), the predicted area declined, which we attribute to declining sample sizes reducing our ability to predict across climatic space. Comparison of models derived from each survey individually showed a significant correlation in predicted area ( $F_{1,13} = 115$ ,  $R^2 = 0.89$ ,  $p = <0.001$ ) (Supplementary Materials, Figure S4). Finally, we report a highly significant relationship between the proportion of farm clusters reporting EXW and the mean count of EXW infected onset ( $F_{1,18} = 1.78$ ,  $p = 0.008$ ) (Figure S5).

## Genetic survey of EXW

313 In a large sample of visibly non-diseased domesticated plants, bacteria of the genera  
314 *Acinetobacter*, *Cyanobacterium*, and *Pseudomonas* were most abundant, whilst *Nostoc*  
315 and *Oscillatoria* were less abundant but recorded in a high proportion of individuals  
316 (Figure 4A). A similar, but more diverse and abundant assemblage was recorded in visibly  
317 non-diseased wild plants, including the genera *Methylobacterium* and *Sphingomonas*  
318 (Figure 4C). We note that whilst *Methylobacterium* has been reported as a frequent  
319 laboratory contaminant (Salter et al. 2014), here it is largely localised to wild samples  
320 extracted using multiple kits and sequenced on different plates, suggesting this is a valid  
321 finding. By contrast, the diseased domesticated sample group was characterised by a  
322 very high mean number of reads of *Xanthomonas*, present in all samples (Figure 4B). It  
323 is noteworthy, however, that reads corresponding to *Xanthomonas* were also identified in  
324 >57% of non-diseased domesticated samples and >86% of wild samples. Of the 19  
325 *Xanthomonas* reference genomes in our blast database, *X. campestris* pv. *musacearum*  
326 (i.e. *Xvm*) was the most frequently identified species (Figure 4D). Finally, retaining only  
327 reads aligning to *Xvm*, we calculated the coverage of the blast hits against the genome  
328 for each sample and plotted these by group (Figure 4E). The recovered sequence length  
329 significantly differed across groups ( $F_{(2,254)}=46.2$ ,  $P<0.001$ ), despite no significant  
330 difference in raw read counts between the three groups ( $F_{(2,254)} = 1.08$ ,  $p = 0.34$ ). A Tukey  
331 post-hoc test indicated significant *Xvm* genome coverage differences between the  
332 domesticated and diseased groups ( $p < 0.001$ ) and wild and diseased groups ( $p < 0.001$ ).  
333 However, there was no significant difference between wild and domesticated ( $p = 0.99$ ).  
334 Of 233 asymptomatic domesticated plant samples, 36 (15%) reported a count of *Xvm*  
335 aligning reads equal to or higher than an EXW symptomatic sample. A further 150 (64%)

plants reported a non-zero number of *Xvm* aligning reads. We plot the distribution of our diseased reference plants and the 36 asymptomatic plants with an equal, or higher number of *Xvm* reads in Figure 5.

## Discussion

The distribution and intensity of pests and pathogens in neglected and underutilised crop species is often poorly known, limiting the effectiveness of mitigation strategies (Bebber et al. 2019). In this study we collate 1069 farm surveys to provide the most detailed analysis to date of the distribution and prevalence of pest and pathogens on enset farms in Ethiopia, together with the perceptions of enset farmers, to develop a baseline from which to assess future trends.

### Farmer surveys

The most frequently recorded pest or pathogen was EXW, occurring on 42% of farms (Figure 2). This is consistent with multiple previous reports emphasising the importance of EXW as a constraint to enset agriculture (Shimelash et al. 2008; Merga et al. 2019; Wolde et al. 2016). However, we found that other much less studied pests and pathogens are also virtually ubiquitous across the enset growing region. Corm rot and root mealybug were reported on 37.6% and 32.6 % of farms respectively. Whilst we know that both EXW and corm rot can result in loss of whole plants, the associated reduction in yield due to mealybug infestation is not known.

Despite large sample sizes, we observed differences in disease prevalence between the two surveys. These may be attributed to a number of causes, particularly survey timing and variation of disease prevalence across overlapping survey areas. Though our



sampling strategy was not designed to ascertain seasonal trends (and so must be used with caution for this purpose), we note that SARI performed a large number of surveys in November and December, a period shortly after the long rainy season in which we see an increase in the number of corm rot observations (Supplementary materials, Figure S1). This may partly account for the disparity in corm rot observations. Observations for EXW, root mealybug and porcupine were largely consistent between surveys. These comparisons emphasise the value of multiple independent surveys, particularly where pathogens are poorly known and may be cryptic.

Our findings are consistent with farmer perceptions, with over 40% reporting EXW to be the primary constraint on enset agriculture (Table 2). However, only 71% of farmers that report EXW as the primary constraint were found to have EXW on their farms. This is in contrast with farmers who reported other pests and pathogens as their primary constraint, where our surveys found the reported pest or pathogen present on the farm >97% of the time. Therefore, EXW is considered a greater constraint by farmers than would be assumed from its frequency alone. This could be due to the potentially devastating impact of EXW, and the risk of greater livelihood and food security consequences than from other pests and pathogens (Azerefegne *et al.* 2009; Savary *et al.* 2012; Borrell *et al.* 2019). For banana farmers in East and Central Africa, Banana Xanthomonas Wilt (BXW) is also ranked above other pests and pathogens (Tushemereirwe *et al.* 2006; Blomme *et al.* 2017).

The prevalence of EXW on Ethiopian enset farms is similar or slightly less severe than published reports of BXW elsewhere in east Africa. In a large survey in Uganda, Nakato *et al.* (2016) recorded BXW in 69-75% of farms, and in Rwanda, Uwamahoro *et al.* (2019)

found prevalence varied from 26-82% of farms. If EXW is indeed less prevalent, it is possible that a) enset is less susceptible to *Xvm*, b) its presence for nearly a century has helped farmers select for a larger proportion of tolerant landraces, c) the lack of insect-vectored transmission with enset reduces observed prevalence and especially incidence and/or d) another factor such as environment or cultural practice reduces disease prevalence. Relatively few surveys in Ethiopia have focused on BXW, to provide a comparison, though a study by Shimelash *et al.* (2008) reported that the number of infected plants varied from ~2-40% across a series of sampling sites stratified by elevation. Major banana growing regions in Ethiopia (e.g. Arba Minch) are largely spatially and altitudinally isolated from the principal area of enset cultivation, which may have served to limit the incidence of *Xvm* in lowland banana production zones.

## **Distribution of pest and pathogens**

We modelled the distribution of five major pest and pathogens and found all to be virtually ubiquitous across the survey area (Figure 3). This helps explain why previous studies have found it challenging to identify hotspots in pathogens such as EXW (Wolde *et al.* 2016; Brandt *et al.* 1997). Our observations were largely consistent across a range of parameters and both independent surveys (Figures S3, S4). Despite the broad distribution of most pests and pathogens, we did observe variation in relative disease prevalence consistent with our limited knowledge on pest and pathogen ecology. For example, the most severely affected regions for Root mealybug appear to be low lying areas along the Great Rift Valley, consistent with reports that mealybugs are most common in moist, humid localities and that they can be dispersed via flooding events (Azerefegne *et al.* 2009). Similarly, we show that corm rot is negatively correlated with

drier localities (higher potential evapotranspiration) which are likely to be less amenable to bacterial multiplication. EXW was more weakly associated with multiple environmental variables, the most important being maximum temperatures and potential evapotranspiration in the coldest quarter. Interestingly, EXW was most strongly positively associated with Continentality (average temperature of the warmest month, minus coldest month). Higher Continentality values are typical of areas where domesticated has expanded beyond the range of wild enset.

Additional unmeasured variables are also likely to be important in refining these models and our understanding of enset disease ecology. For example, the wide diversity of cultural practices may regionally facilitate or hinder control of pests or transmission of pathogens. Whilst we did not find that ‘distance to roads’ was a strong predictor as might have been expected for pathogens such as EXW and root mealybug that can be transmitted through planting materials, other socioeconomic variables such as farm density or the proportion of enset in the local crop mix, may be important. Whilst some data on the prevalence of enset agriculture is available (Borrell et al. 2020), these data are not at a sufficiently high resolution to be analytically tractable. Pests and pathogens may also vary in their ecology and virulence (Goss and Bergelson 2006). For example, researchers screening enset landraces for *Xvm* tolerance have reported varying virulence across *Xvm* isolates (Muzemil et al. 2020; Merga et al. 2019; G Welde-Michael et al. 2008). Finally, while our data captures pest and pathogen farm-level prevalence, it does not quantify disease incidence or severity i.e. the impact on yield or livelihoods. Future surveys focused on quantifying yield reduction would complement this work.

## **Evidence of EXW in asymptomatic plants**

In this study, we are confident that we have detected *X. vasicola* pv. *musacearum* in 'diseased' samples as they display the known disease phenotype and a large number of reads blast align to the *Xvm* genome sequence (Figure 4). Surprisingly, we also detected a significant number of *Xvm* reads in asymptomatic domesticated and wild enset plant samples. There are three possible explanations for this observation. First, a subset of landraces may display some tolerance or resistance meaning that the pathogen can be present without causing symptoms. Second, we may be detecting a non-pathogenic or closely related *Xanthomonas* pathovar in our asymptomatic samples (Alemayehu et al. 2016). This is supported by the fact that variation in the pathogenicity of different strains has been reported previously (G Welde-Michael et al. 2008; Merga et al. 2019; Muzemil et al. 2020; Haile et al. 2020). Finally, it is possible that we are detecting *Xvm* during the incubation period. The incubation period in enset appears to be longer than in *Musa*, though this depends on the infected landrace, entry point of the pathogen, inoculum level and age of the plants (Ocimati et al. 2013; G. Welde-Michael et al. 2008; G Welde-Michael et al. 2008). In this case we would conclude that *Xvm* is present, and may eventually cause symptoms. We note that long term latent infections have been reported in East african bananas (Ocimati et al. 2013). It is also noteworthy that we detect *Xvm* in wild enset, which is consistent with reports by Alemayehu *et al.* (2016) of wild enset susceptibility. However unlike Alemayehu *et al.*, throughout our extensive fieldwork we have not observed a wild enset plant displaying EXW symptoms and it is not clear how *Xvm* could cross generations in a wild unmanaged population.

We consider it plausible that all three explanations may be responsible to varying degrees. Therefore, whilst we have likely detected *Xvm* during incubation in some

individuals, this probably does not explain detection of *Xvm* in nearly half of asymptomatic domesticated plants and nearly all wild plants. Therefore, tolerance of low levels of *Xvm* and the existence of latent infections, coupled with a possible wider diversity and varying pathogenicity of *Xvm* in enset agricultural systems, suggests that the overall distribution of this pathogen may have been underestimated.

### **Current research gaps**

Building on the first region wide pest and pathogen distribution maps, we attempt to identify major outstanding research gaps. Firstly, whilst a growing number of studies are surveying putatively EXW tolerant or resistant enset landraces it remains to be understood why EXW appears to predominantly affect 4-5 year old plants (Wolde et al. 2016) (or whether that is simply observation bias as these are likely to be the most common group demographically). Secondly, abiotic stress prior to infection can predispose plants to pathogen susceptibility (Bostock et al. 2014). It is possible that susceptibility to EXW is exacerbated by abiotic stress, such as drought or cold shock, though the underlying processes may be much more complex (Neil et al. 2017). It would be worthwhile to identify a stratified sample of farms for continued repeat EXW surveys to understand seasonality patterns in severity. Similarly, transmission may be higher under certain environmental conditions. Shimwela *et al.* (2016) reported higher BXW incidence during the rainy season, attributed to higher water levels in plant tissue favouring bacteria development. This suggests that transmission can also be higher in wet conditions as inoculum levels may be elevated (Blomme et al. 2017), and tool use increases for management reasons. Finally, we have not addressed potential interactions, for example, whether root mealybug infestation makes enset more

susceptible to EXW, or facilitates entry of the pathogen into the roots or corm. However we note the strong niche overlap between porcupine (as a putative vector) and both EXW and corm rot (Table 4).

## Conclusions

In conclusion, farmers clearly consider EXW to be the predominant constraint on enset agriculture. Their concern may be justified based on evidence presented here that *Xvm* is more widespread and prevalent than previously recognised, partly explaining the propensity of EXW to appear unexpectedly. In a regional context, *Xvm* it can be considered one of the most important and widespread disease of *Musa* in East and Central Africa with significant economic and food security impacts. Whilst EXW has proven to be a substantial challenge for effective disease management in small scale farming settings, comparatively less research has been undertaken on corm rot and root mealybug, which our data demonstrates are similarly widespread and prevalent. Whilst they may not have the potential severity of EXW, they may cumulatively have a significant impact on overall yields and food security. Despite the significant challenges that pathogens such as *Xvm* pose, enset agriculture is rich in indigenous knowledge, genetically diverse landraces and a wide range of agronomic practices; significantly more so than in the introduced (in Ethiopia) genetically depauperate and agronomically uniform *Musa* crop, which predominantly focusses on the Cavendish dessert banana types. This suggests that further research in enset may have translational benefits for related species in Ethiopia and beyond.

## Acknowledgements

We thank the Southern Agricultural Research Institute for providing logistical support, and numerous agricultural extension agents for facilitating fieldwork.

## Funding

The Global Challenges Research Fund, Foundation Awards for Global Agricultural and Food Systems Research, entitled, ‘Modelling and genomics resources to enhance exploitation of the sustainable and diverse Ethiopian starch crop enset and support livelihoods’ [Grant No. BB/P02307X/1]; The European Community Horizon 2020 grant Project ID 727624, “ Microbial uptake for sustainable management of major banana pests and diseases (MUSA)” and The McKnight foundation.

## Author Contributions

ZY, JB, WM and SM performed field surveys and collated data. JB designed and performed spatial analysis with contributions from IO. MB and JD sequenced enset tissue samples and OW processed and analysed sequence data. JB wrote the first draft of the manuscript and produced the figures. All authors contributed to and approved the final version of the manuscript.

# Literature Cited

- 515 Addis, T. 2010. Biology, Geographical Distribution, Prevention and Control of the Enset Root  
516 Mealybug, *Cataenococcus ensete* (Homoptera: Pseudococcidae) in Ethiopia. *Tree For. Sci.*  
517 *Biotechnol.* 8:251–260.
- 518 Addis, T., Azerefegne, F., and Blomme, G. 2008. Density and distribution on enset root  
519 mealybugs on enset. *African Crop Sci. J.* 16:67–74.
- 520 Addis, T., Azerefegne, F., Blomme, G., and K. Kanaujia. 2008. Biology of the Enset Root  
521 Mealybug *Cataenococcus ensete* and its Geographical Distribution in Southern Ethiopia. *J.*  
522 *Appl. Biosci.* 8:251–260.
- 523 Addis, T., Turyagyenda, L. F., Alemu, T., Karamura, E., and Blomme, G. 2010. Garden tool  
524 transmission of *xanthomonas campestris* pv. *musacearum* on banana (*Musa* spp.) and enset in  
525 Ethiopia. *Acta Hortic.* 879:367–372.
- 526 Alemayehu, C., Tadesse, K., and Guy, B. 2016. Natural occurrence and pathogenicity of  
527 *Xanthomonas* bacteria on selected plants. *African J. Biotechnol.* 15:2146–2155 Available at:  
528 <http://academicjournals.org/journal/AJB/article-abstract/B6B571E60675>.
- 529 Aritua, V., Parkinson, N., Thwaites, R., Heeney, J. V, Jones, D. R., Tushemereirwe, W., et al.  
530 2008. Characterization of the *Xanthomonas* sp . causing wilt of enset and banana and its  
531 proposed reclassification as a strain of *X . vasicola*. :170–177.
- 532 Azerefegne, F., Addis, T., Alemu, T., Lemawork, S., Tadesse, E., Gemu, M., et al. 2009. *An IPM*  
533 *guide for Enset root mealybug (Cataenococcus ensete) in Enset production*.
- 534 Bebber, D. P., Field, E., Gui, H., Mortimer, P., Holmes, T., and Gurr, S. J. 2019. Many  
535 unreported crop pests and pathogens are probably already present. *Glob. Chang. Biol.*  
536 25:2703–2713.
- 537 Bebber, D. P., Holmes, T., and Gurr, S. J. 2014. The global spread of crop pests and  
538 pathogens. *Glob. Ecol. Biogeogr.* 23:1398–1407.
- 539 Bivand, R., Stuetz, R., Ove, K., Giraudoux, P., Davis, M., and Santilli, S. 2018. Package ‘rgeos  
540 .’ Available at: <https://cran.r-project.org/web/packages/rgeos/rgeos.pdf>.
- 541 Blomme, G., Dita, M., Jacobsen, K. S., Pérez Vicente, L., Molina, A., Ocimati, W., et al. 2017.  
542 Bacterial Diseases of Bananas and Enset: Current State of Knowledge and Integrated  
543 Approaches Toward Sustainable Management. *Front. Plant Sci.* 8:1–25 Available at:  
544 <http://journal.frontiersin.org/article/10.3389/fpls.2017.01290/full>.
- 545 Blomme, G., Ploetz, R., Jones, D., De Langhe, E., Price, N., Gold, C., et al. 2013. A historical  
546 overview of the appearance and spread of *Musa* pests and pathogens on the African continent:  
547 Highlighting the importance of clean *Musa* planting materials and quarantine measures. *Ann.*  
548 *Appl. Biol.* 162:4–26.
- 549 Bobosha, K. 2003. Characterization of *Xanthomonas campestris* pv *musacearum* isolates:  
550 causal agent of enset bacterial wilt disease.
- 551 Bogale, M., Mekete, T., and Protection, P. 2004. Survey of Plant Parasitic Nematodes and  
552 Banana Weevil. *Nematol. Mediterr.* 32:223–227 Available at: <http://www.inaav.ba.cnr.it/vol32-2,>  
553 2004/vol32-2o.pdf.



554 Bolger, A. M., Lohse, M., and Usadel, B. 2014. Trimmomatic: A flexible trimmer for Illumina  
555 sequence data. *Bioinformatics*. 30:2114–2120.

556 Borrell, J. S., Biswas, M. K., Goodwin, M., Blomme, G., Schwarzacher, T., Heslop-Harrison, P.  
557 J. S., et al. 2019. Enset in Ethiopia: a poorly characterised but resilient starch staple. *Ann. Bot.*  
558 123 (5):747–766.

559 Borrell, J. S., Dodsworth, S., Forest, F., Perez-Escobar, O. A., Lee, M. A., Mattana, E., et al.  
560 2019. The climatic challenge: Which plants will people use in the next century? *Environ. Exp.*  
561 *Bot.* 170.

562 Borrell, J. S., Goodwin, M., Blomme, G., Jacobsen, K., Wendawek, A. M., Gashu, D., et al.  
563 2020. Enset based agri-systems in Ethiopia: A systematic review of production trends,  
564 agronomy, processing and the wider food security applications of a neglected banana relative.  
565 *Plants, People, Planet.* 00:1–17.

566 Bostock, R. M., Pye, M. F., and Roubtsova, T. V. 2014. Predisposition in Plant Disease:  
567 Exploiting the Nexus in Abiotic and Biotic Stress Perception and Response. *Annu. Rev.*  
568 *Phytopathol.* 52:517–49.

569 Bouwmeester, H., Heuvelink, G. B. M., and Stoorvogel, J. J. 2016. Mapping crop diseases using  
570 survey data: The case of bacterial wilt in bananas in the East African highlands. *Eur. J. Agron.*  
571 74.

572 Brandt, S. A., Spring, A., Hiebsch, C., McCabe, J. T., Tabogie, E., Wolde-Michael, G., et al.  
573 1997. The “Tree Against Hunger”: Enset-based Agricultural System in Ethiopia. *Adv. Sci.* :56.

574 Bruce, T. J. A. 2010. Tackling the threat to food security caused by crop pests in the new  
575 millennium. *Food Secur.* 2:133–141.

576 Camacho, C., Coulouris, G., Avagyan, V., Ma, N., Papadopoulos, J., Bealer, K., et al. 2009.  
577 BLAST+: Architecture and applications. *BMC Bioinformatics*. 10:1–9.

578 Carter, B. A., Reeder, R., Mgenzi, S. R., Kinyua, Z. M., Mbaka, J. N., Doyle, K., et al. 2010.  
579 Identification of *Xanthomonas vasicola* (formerly *X. campestris* pv. *musacearum*), causative  
580 organism of banana xanthomonas wilt, in Tanzania, Kenya and Burundi. *Plant Pathol.* 59:403.

581 Castellani, E. 1939. Su un marciume dell' ensete. *L'Agric. Colon. Firenze*. 33:297–300.

582 Center for International Earth Science Information Network, C. C. U. 2017. Gridded Population  
583 of the World, Version 4 (GPWv4): Population Count, Revision 10. Available at:  
584 <https://doi.org/10.7927/H4PG1PPM>.

585 Challis, R., Richards, E., Rajan, J., Cochrane, G., and Blaxter, M. 2020. BlobToolKit - Interactive  
586 Quality Assessment of Genome Assemblies. *G3 Genes, Genomes, Genet.* 10:g3.400908.2019.

587 Doyle, J., Doyle, J. L. 1987. Genomic plant DNA preparation from fresh tissue-CTAB method.  
588 *Phytochem Bull.* 19:11–15.

589 Fick, S. E., and Hijmans, R. J. 2017. WorldClim 2: new 1-km spatial resolution climate surfaces  
590 for global land areas. *Int. J. Climatol.* 37:4302–4315.

591 Forum, P. O., Carvajal-Yepes, M., Cardwell, K., Nelson, A., Garrett, K. A., Giovani, B., et al.  
592 2019. A global surveillance system for crop diseases. *Science* (80-. ). 364:1237–1239 Available  
593 at: <http://science.sciencemag.org/content/364/6447/1237.abstract>.

594 Fu, L., Niu, B., Zhu, Z., Wu, S., and Li, W. 2012. CD-HIT: Accelerated for clustering the next-

595 generation sequencing data. *Bioinformatics*. 28:3150–3152.

596 Goss, E. M., and Bergelson, J. 2006. Variation in resistance and virulence in the interaction  
597 between *Arabidopsis thaliana* and a bacterial pathogen. *Evolution* (N. Y). 60:1562–1573.

598 Haile, B., Fininsa, C., Terefe, H., Chala, A., and Hussien, S. 2020. Evaluation of enset (*Ensete*  
599 *ventricosum*) clones for resistance reaction against pathogenic *Xanthomonas campestris* pv.  
600 *musacearum* isolates from Southwestern Ethiopia. *Cogent Food Agric*. 6 Available at:  
601 <https://doi.org/10.1080/23311932.2020.1773094>.

602 Heeb, L., Jenner, E., and Cock, M. J. W. 2019. Climate - smart pest management : building  
603 resilience of farms and landscapes to changing pest threats. *J. Pest Sci.* (2004). 92:951–969  
604 Available at: <https://doi.org/10.1007/s10340-019-01083-y>.

605 Hijmans, R. J. 2017. raster: Geographic Data Analysis and Modeling. R package version 2.6-7.

606 Hijmans, R. J., Philips, S., Leathwick, J., and Elith, J. 2017. dismo: Species Distribution  
607 Modeling. R package version 1.1-4.

608 Hunduma, T., Kassahun, S., Hilu, E., and Oli, M. 2015. Evaluation of Enset Clones Resistance  
609 against Enset Bacterial Wilt Disease (*Xanthomonas campestris* pv. *musacearum*). *J. Vet. Sci.*  
610 *Technol*. 06 Available at: [http://www.omicsonline.org/open-access/evaluation-of-enset-clones-](http://www.omicsonline.org/open-access/evaluation-of-enset-clones-resistance-against-enset-bacterial-wilt-disease-xanthomonas-campestris-pv-musacearum-2157-7579-1000232.php?aid=52024)  
611 [resistance-against-enset-bacterial-wilt-disease-xanthomonas-campestris-pv-musacearum-2157-](http://www.omicsonline.org/open-access/evaluation-of-enset-clones-resistance-against-enset-bacterial-wilt-disease-xanthomonas-campestris-pv-musacearum-2157-7579-1000232.php?aid=52024)  
612 [7579-1000232.php?aid=52024](http://www.omicsonline.org/open-access/evaluation-of-enset-clones-resistance-against-enset-bacterial-wilt-disease-xanthomonas-campestris-pv-musacearum-2157-7579-1000232.php?aid=52024).

613 Jarvis, A., Reuter, H. I., Nelson, A., and Guevara, E. 2008. Hole-filled SRTM for the globe  
614 Version 4, available from the CGIAR-CSI SRTM 90m Database. Available at:  
615 <http://srtm.csi.cgiar.org>.

616 Jones, D. R. 2000. *Diseases of Banana, Abacá and Enset*. Walingford, Reino Unido: CABI  
617 Publishing.

618 Jones, D. R. 2018. *Handbook of diseases of banana, abaca and enset*. CABI.

619 Kriticos, D. J., Webber, B. L., Leriche, A., Ota, N., Macadam, I., Bathols, J., et al. 2012.  
620 CliMond: Global high-resolution historical and future scenario climate surfaces for bioclimatic  
621 modelling. *Methods Ecol. Evol.* 3:53–64.

622 Lemawork, S., Azerefegne, F., Alemu, T., Addis, T., and Blomme, G. 2018. Hot water  
623 immersion disinfests enset ( *Ensete ventricosum* ) suckers from the enset root mealybug  
624 *Cataenococcus ensete* Williams and Matile-Ferrero. 13:1990–1997.

625 Lescot, T. 1988. Influence of altitude on populations of banana weevil (*Cosmopolites sordidus*  
626 Germar). *Fruits* (France). 43:433–437.

627 Lever, J., Krzywinski, M., and Altman, N. 2017. Principal component analysis. *Nat. Publ. Gr.*  
628 14:641–642 Available at: <http://dx.doi.org/10.1038/nmeth.4346>.

629 McKnight-CCRP. 2013. *“Integrated Management of Bacterial Wilt of Enset (Ensete ventricosum*  
630 *(Welw.) Cheesman) caused by Xanthomonas campestris* pv. *musacearum* in Ethiopia.

631 Merga, I., Tripathi, L., Hvosllef-Eide, A., and Gebre, E. 2019. Application of Genetic Engineering  
632 for Control of Bacterial Wilt Disease of Enset , Ethiopia ’ s Sustainability Crop. *Front. Plant Sci.*  
633 10.

634 Muzemil, S., Chala, A., Tesfaye, B., Studholm, D. J., Grant, M., Yemataw, Z., et al. 2020.  
635 Evaluation of 20 enset (*Ensete ventricosum*) landraces for response to *Xanthomonas vasicola*

636 pv. musacearum infection. bioRxiv.

637 Naimi, B. 2017. Package 'usdm'.

638 Nakato, G. V., Beed, F., Bouwmeester, H., Ramathani, I., Mpiira, S., Kubiriba, J., et al. 2016.

639 Building agricultural networks of farmers and scientists via mobile phones: case study of banana

640 disease surveillance in Uganda. Can. J. Plant Pathol. 38:307–316 Available at:

641 <https://doi.org/10.1080/07060661.2016.1230149>.

642 Neil, R., Miller, G., Sergio, G., Alves, C., and Sluys, M. Van. 2017. Plant immunity : unravelling

643 the complexity of plant responses to biotic stresses. :681–687.

644 O'Leary, N. A., Wright, M. W., Brister, J. R., Ciufo, S., Haddad, D., McVeigh, R., et al. 2016.

645 Reference sequence (RefSeq) database at NCBI: Current status, taxonomic expansion, and

646 functional annotation. Nucleic Acids Res. 44:D733–D745.

647 Ocimati, W. D., Bouwmeester, H., Groot, J. C. J., Tittone, P., Brown, D., and Blomme, G. 2019.

648 The risk posed by Xanthomonas wilt disease of banana : Mapping of disease hotspots , fronts

649 and vulnerable landscapes. PLoS One. 14:1–19.

650 Ocimati, W., Ssekiwoko, F., Karamura, E., Tinzaara, W., and Eden-green, S. 2013. Systemicity

651 of Xanthomonas campestris pv . musacearum and time to disease expression after

652 inflorescence infection in East African highland and Pisang Awak bananas in Uganda. Plant

653 Pathol. 62:777–785.

654 OpenStreetMap contributors. 2015. OSM. Planet dump \$DATE.

655 Ott, A., Liu, S., Schnable, J. C., Yeh, C. T., Wang, K. S., and Schnable, P. S. 2017.

656 tGBS@genotyping-by-sequencing enables reliable genotyping of heterozygous loci. Nucleic

657 Acids Res. 45.

658 Pateiro-lopez, M. B. 2019. Package 'alphahull'.

659 Pironon, S., Etherington, T. R., Borrell, J. S., Kuhn, N., Macias-Fauria, M., Ondo, I., et al. 2019.

660 Potential adaptive strategies for 29 Sub-Saharan crops under future climate change. Nat. Clim.

661 Chang. 9:758–763.

662 Quimio, A. J. 1992. *Annual report of the plant pathologist: July 17, 1991- July 16, 1992. Enset*

663 *Team Support Project. Sidamo Gamo-Goffa Peasant agricultural Development Program.*

664 Quimio, A. J. 1991. *First quarter report of the plant pathologists: July 1- September 30, 1991.*

665 *Enset Team Support Project. Sidamo Gamo Goffa Peasant agricultural Development Program.*

666 *PADEP III.*

667 Quimio, A. J., Mesfin, T., and Tessera, M. 1996. Diseases of Enset. In *In: Tsedeke A., Hiebsch,*

668 *C., Brandt, S.A., Seifu G.M. (Eds.), pp. 188-203. Enset-Based Sustainable Agriculture in*

669 *Ethiopia. Proceedings of the International Work shop on enset. Addis Ababa, Ethiopia, 13-20*

670 *December 1993., eds. A. Tsedeke, H. Clifton, S.A. Brandt, and G. Seifu. Addis Ababa, Ethiopia,*

671 *p. 188–203.*

672 R Core team. 2019. *R: A language and environment for statistical computing.* Vienna, Austria: R

673 Foundation for Statistical Computing.

674 Sahle, M., Yeshitela, K., and Saito, O. 2018. Mapping the supply and demand of Enset crop to

675 improve food security in Southern Ethiopia. Agron. Sustain. Dev. 38:7 Available at:

676 <http://link.springer.com/10.1007/s13593-017-0484-0>.

677 Salter, S. J., Cox, M. J., Turek, E. M., Calus, S. T., Cookson, W. O., Moffatt, M. F., et al. 2014.  
678 Reagent and laboratory contamination can critically impact sequence-based microbiome  
679 analyses. :1–12.

680 Savary, S., Ficke, A., Aubertot, J., and Hollier, C. 2012. Crop losses due to diseases and their  
681 implications for global food production losses and food security. Food Secur. :519–537.

682 Savary, S., Willocquet, L., Pethybridge, S. J., Esker, P., Mcroberts, N., and Nelson, A. 2019.  
683 The global burden of pathogens and pests on major food crops. Nat. Ecol. Evol. 3:430–439  
684 Available at: <http://dx.doi.org/10.1038/s41559-018-0793-y>.

685 Shank, R., and Ertiro, C. 1996. *A Linear Model for Predicting Enset Plant Yield and Assessment*  
686 *of Kocho Production in Ethiopia*. Addis Ababa.

687 Shimelash, D., Alemu, T., Addis, T., Turyagyenda, F. L., and Blomme, G. 2008. Banana  
688 Xanthomonas Wilt in Ethiopia: Occurrence and Insect Vector Transmission. African Crop Sci. J.  
689 16:75–87.

690 Shimwela, M. M., Ploetz, R. C., Beed, F. D., Jones, J. B., Blackburn, J. K., Mkulila, S. I., et al.  
691 2016. Banana xanthomonas wilt continues to spread in Tanzania despite an intensive  
692 symptomatic plant removal campaign: an impending socio-economic and ecological disaster.  
693 Food Secur. 8:939–951 Available at: <http://dx.doi.org/10.1007/s12571-016-0609-3>.

694 Spring, A. 1996. *Enset farming systems in southern region, ethiopia: Report on a rapid rural*  
695 *appraisal in Gurage, Hadiya, and Sidama Zones*.

696 Studholme, D. J., Wicker, E., Abrare, S. M., Aspin, A., Bogdanove, A., Broders, K., et al. 2019.  
697 Transfer of Xanthomonas campestris pv . arecae and X . campestris pv . musacearum to X .  
698 vasicola ( Vauterin ) as X . vasicola pv . arecae. Phytopathology. :1–8.

699 Tadesse, M., Babosha, K., Diro, M., and Wolde-Michael, G. 2003. Enset bacterial wilt sanitary  
700 control in Gurage Zone. :23.

701 Tamrat, S., Borrell, J. S., Biswas, M. K., Gashu, D., Wondimu, T., and Carlos, A. 2020.  
702 Micronutrient composition and microbial community analysis across diverse landraces of the  
703 Ethiopian orphan crop enset. BioRxiv.

704 Tessera, M., and Quimio, A. J. J. 1994. Research on enset pathology. In *Proceedings of the*  
705 *2nd National Horticultural Workshop of Ethiopia*, eds. E Herath and L Desalegn. Institute of  
706 Agricultural Research, Addis Ababa.: IAR, p. 217–225.

707 Tewodros, M., and Tesfaye, W. 2014. Farmers indigenous knowledge and assessment of enset  
708 (Ensete ventricosum Welw . Cheesman) cultivars for major insect pests in Ojoja water shade  
709 Kembata- tembaro zone, South Ethiopia. Sky J. Agric. Res. 3:112–119.

710 Title, P. O., and Bemmels, J. B. 2018. ENVIREM: an expanded set of bioclimatic and  
711 topographic variables increases flexibility and improves performance of ecological niche  
712 modeling. Ecography (Cop.). 41:291–307.

713 Tushemereirwe, W. K., Okaasai, O. O., Kubiriba, J., Nankinga, C., Muhangi, J., Odoi, N., et al.  
714 2006. Status of banana bacterial wilt in Uganda. African Crop Sci. J. 14:73–82.

715 Uwamahoro, F., Berlin, A., Bylund, H., Bucagu, C., and Yuen, J. 2019. Management strategies  
716 for banana Xanthomonas wilt in Rwanda include mixing indigenous and improved cultivars.  
717 Agron. Sustain. Dev. 39.

718 Vurro, M., Bonciani, B., and Vannacci, G. 2010. Emerging infectious diseases of crop plants in  
719 developing countries: impact on agriculture and socio-economic consequences. *Food Secur.*  
720 2:113–132 Available at: <https://doi.org/10.1007/s12571-010-0062-7>.

721 Wasukira, A., Tayebwa, J., Thwaites, R., Paszkiewicz, K., Aritua, V., Kubiriba, J., et al. 2012.  
722 Genome-Wide Sequencing Reveals Two Major Sub-Lineages in the Genetically Monomorphic  
723 Pathogen *Xanthomonas Campestris* Pathovar *Musacearum*. *Genes (Basel)*. 3:361–377.

724 Welde-Michael, G., Bobosha, K., Addis, T., Blomme, G., Mekonnen, S., and Mengesha, T.  
725 2008. Mechanical transmission and survival of bacterial wilt on enset. *African Crop Sci. J.*  
726 16:97–102.

727 Welde-Michael, G., Bobosha, K., Blomme, G., Addis, T., Mengesha, T., Mekonnen, S., et al.  
728 2008. Evaluation of enset clones against enset bacterial wilt. *African Crop Sci. J.* 16:89–95.

729 Wolde, M., Ayalew, A., and Chala, A. 2016. Assessment of bacterial wilt (*Xanthomonas*  
730 *campestris* pv . *musacearum*) of enset in Southern Ethiopia. *African J. Agric. Res.* 11:1724–  
731 1733.

732 Yemataw, Z., Mekonen, A., Chala, A., Tesfaye, K., Mekonen, K., Studholme, D. J., et al. 2017.  
733 Farmers' knowledge and perception of enset *Xanthomonas* wilt in southern Ethiopia. *Agric.*  
734 *Food Secur.* 6:1–12 Available at: <https://doi.org/10.1186/s40066-017-0146-0>.

735 Yemataw, Z., Tesfaye, K., Zeberga, A., and Blomme, G. 2016. Exploiting indigenous knowledge  
736 of subsistence farmers' for the management and conservation of Enset (*Ensete ventricosum*  
737 (Welw.) Cheesman) (*musaceae* family) diversity on-farm. *J. Ethnobiol. Ethnomed.* 12:34  
738 Available at: <http://ethnobiomed.biomedcentral.com/articles/10.1186/s13002-016-0109-8>.

739 Yirgou, D., and Bradbury, J. F. 1968. Bacterial wilt of enset (*Ensete ventricosum*) incited by  
740 *Xanthomonas musacearum* sp. n. *Phytopathology*. 58:111–112.

741 Yirgu, T. 2016. Land use Dynamics and challenges of Enset ( *Ensete ventricosum* ) agriculture  
742 in the upper reaches of Baso-Deme watershed , Gamo Highland, SW Ethiopia. *Glob. J.*  
743 *Interdisc. Soc. Sci.* 5:20–28.

744 Zerfu, A., Gebre, S. L., Berecha, G., and Getahun, K. 2018. Assessment of spatial distribution of  
745 enset plant diversity and enset bacteria wilt using geostatistical techniques in Yem special  
746 district, Southern Ethiopia. *Environ. Syst. Res.* 7:23 Available at:  
747 <https://environmentalsystemsresearch.springeropen.com/articles/10.1186/s40068-018-0126-9>.

748

749

750

751

752

753

754

755

756



# Tables

**Table 1.** Reported pests and pathogens of domesticated enset (*Ensete ventricosum*) in Ethiopia.

| Disease                             | Known causal organism                                                        | Severity and impact                                                                            | Management advice available                                                                           | References                                                       |
|-------------------------------------|------------------------------------------------------------------------------|------------------------------------------------------------------------------------------------|-------------------------------------------------------------------------------------------------------|------------------------------------------------------------------|
| Enset Bacterial Wilt (EXW)          | <i>Xanthomonas vasicolapv. musacearum</i> (Xvm)                              | Considered the most important disease of enset. Potential for complete crop loss.              | Sanitary Measures                                                                                     | Yirgou and Bradbury (1968)                                       |
| Bacterial corm rot                  | Unidentified bacterium, potentially <i>Erwinia</i> or <i>Dickeya</i> species | Not known. Potential for loss of individual whole plants                                       | Not available                                                                                         | Quimio et al. (1996)                                             |
| Sheath rot of enset                 | Unidentified                                                                 | Not known. Potential for loss of individual whole plants.                                      | Not available                                                                                         | Quimio (1991)                                                    |
| Leaf spot                           | <i>Phyllostica</i> sp., <i>Pyricularia</i> sp., and <i>Drechslera</i> sp     | Not known                                                                                      | Not available                                                                                         | Quimio et al. (1996)                                             |
| Leaf spot                           | <i>Cladosporium</i> Sp. and <i>Deightonella</i> Sp.                          | Not known                                                                                      | Not available                                                                                         | Quimio et al. (1996)                                             |
| Sigatoka                            | <i>Mycosphaerella musicola</i>                                               | Not known                                                                                      | Not available, but potentially available from Banana.                                                 | Quimio et al. (1996)                                             |
| <i>Sclerotium</i> wilt and root rot | <i>Sclerotium rolfsi</i>                                                     | Not known                                                                                      | Not available                                                                                         | (Quimio 1992)                                                    |
| Mosaic and chlorotic streak         | Unidentified                                                                 | Not known                                                                                      | Not available                                                                                         | (Quimio 1992, 1991)                                              |
| Root knot nematode                  | <i>Meloidogyne</i> sp.                                                       | Not known                                                                                      | Not available                                                                                         | (Tessera and Quimio 1994)                                        |
| Vertebrate pests                    | <i>Porcupine</i> , <i>mole rat</i> , <i>pigs</i> , <i>monkeys</i> )          | Not known. Potential disease vector.                                                           | Cultural practices, traps                                                                             | Kefale and Stephen, (1991)                                       |
| Leaf hopper                         | <i>Sophonia</i> sp                                                           | Not known. Potential disease vector.                                                           | Not available                                                                                         | (Zerfu et al. 2018)                                              |
| Enset root mealybug                 | <i>Cataenococcus ensete</i>                                                  | Likely to be localised yield reductions due to retardation of growth. Potential disease vector | Integration of methods (boiling water treatments, cultural practices, botanicals, use of insecticide) | Lemawork et al. (2018); Addis, Azerefegne, Blomme, et al. (2008) |

\*We note that whilst in many cases 'Management advice' is not available or reported, there may nevertheless be local cultural practices that warrant further research and investigation

**Table 2.** Comparison of farmer perceived constraints and associated proportion of farms on which each pest or pathogen was recorded. Columns one and two denote the reported constraint; subsequent columns show the proportion of those farms in which each pest or pathogen was recorded.

| Farmer reported constraint | Number of reports* | Proportion of farms in which species was recorded |               |          |         |           |
|----------------------------|--------------------|---------------------------------------------------|---------------|----------|---------|-----------|
|                            |                    | EXW                                               | Root mealybug | Corm rot | Molerat | Porcupine |
| EXW                        | 265 (45.9%)        | 0.71                                              | 0.29          | 0.48     | 0.31    | 0.42      |
| Root mealybug              | 48 (8.3%)          | 0.15                                              | 0.98          | 0.31     | 0.13    | 0.38      |
| Corm rot                   | 87 (15.1%)         | 0.07                                              | 0.21          | 1.00     | 0.13    | 0.28      |
| Molerat                    | 49 (8.5%)          | 0.20                                              | 0.45          | 0.39     | 0.98    | 0.47      |
| Porcupine                  | 53 (9.2%)          | 0.17                                              | 0.23          | 0.47     | 0.26    | 0.98      |

\* Three additional respondents reported Wild pigs, one leaf blight and one leaf hopper.

**Table 3.** Kendall rank correlation coefficient for each spatial variable and the PCA-derived distribution of each pest and pathogen.

| Spatial variables                | EXW    | Corm<br>rot | Root<br>mealybug | Molerat | Porcupine |
|----------------------------------|--------|-------------|------------------|---------|-----------|
| Thornthwaite aridity index       | 0.038  | -0.039      | -0.010           | -0.090  | 0.007     |
| Precipitation of wettest week    | 0.014  | 0.020       | -0.055           | 0.022   | -0.091    |
| Precipitation of warmest quarter | -0.008 | 0.027       | -0.088           | 0.097   | -0.026    |
| Precipitation of coldest quarter | 0.016  | 0.030       | -0.129           | 0.035   | -0.078    |
| Mean diurnal temperature range   | 0.030  | -0.022      | 0.008            | -0.091  | 0.050     |
| Isothermality                    | -0.037 | 0.042       | -0.122           | 0.039   | -0.036    |
| Climatic Moisture Index          | 0.001  | 0.044       | -0.076           | 0.090   | -0.102    |
| continentality                   | 0.050  | -0.055      | 0.060            | -0.104  | 0.017     |
| Max Temp. Coldest                | -0.047 | -0.053      | 0.048            | -0.054  | 0.044     |
| PET Coldest Quarter              | -0.050 | -0.046      | 0.118            | -0.008  | 0.060     |
| PET Driest Quarter               | -0.010 | -0.044      | 0.124            | -0.075  | 0.054     |
| PET Wettest Quarter              | 0.030  | -0.080      | 0.068            | -0.105  | 0.021     |
| Topographic position Index       | 0.004  | -0.009      | -0.009           | -0.014  | 0.012     |
| Elevation                        | 0.032  | 0.039       | -0.030           | 0.048   | -0.029    |
| Distance to a major road         | 0.001  | 0.045       | 0.008            | 0.038   | -0.047    |



**Table 4.** Pairwise niche overlap across the five major enset pests and pathogens.

Lower triangle indicates overlap at 10% prevalence quantile. Upper triangle indicates overlap at 90% prevalence quantile.

| Pests and pathogens | EXW  | Corm rot | Root mealybug | Molerat | Porcupine |
|---------------------|------|----------|---------------|---------|-----------|
| EXW                 | -    | 0.32     | 0.01          | 0.05    | 0.33      |
| Corm rot            | 0.96 | -        | 0.02          | 0.04    | 0.24      |
| Root mealybug       | 0.91 | 0.91     | -             | 0.00    | 0.20      |
| Molerat             | 0.84 | 0.85     | 0.91          | -       | 0.03      |
| Porcupine           | 0.96 | 0.96     | 0.94          | 0.87    | -         |

# Figures

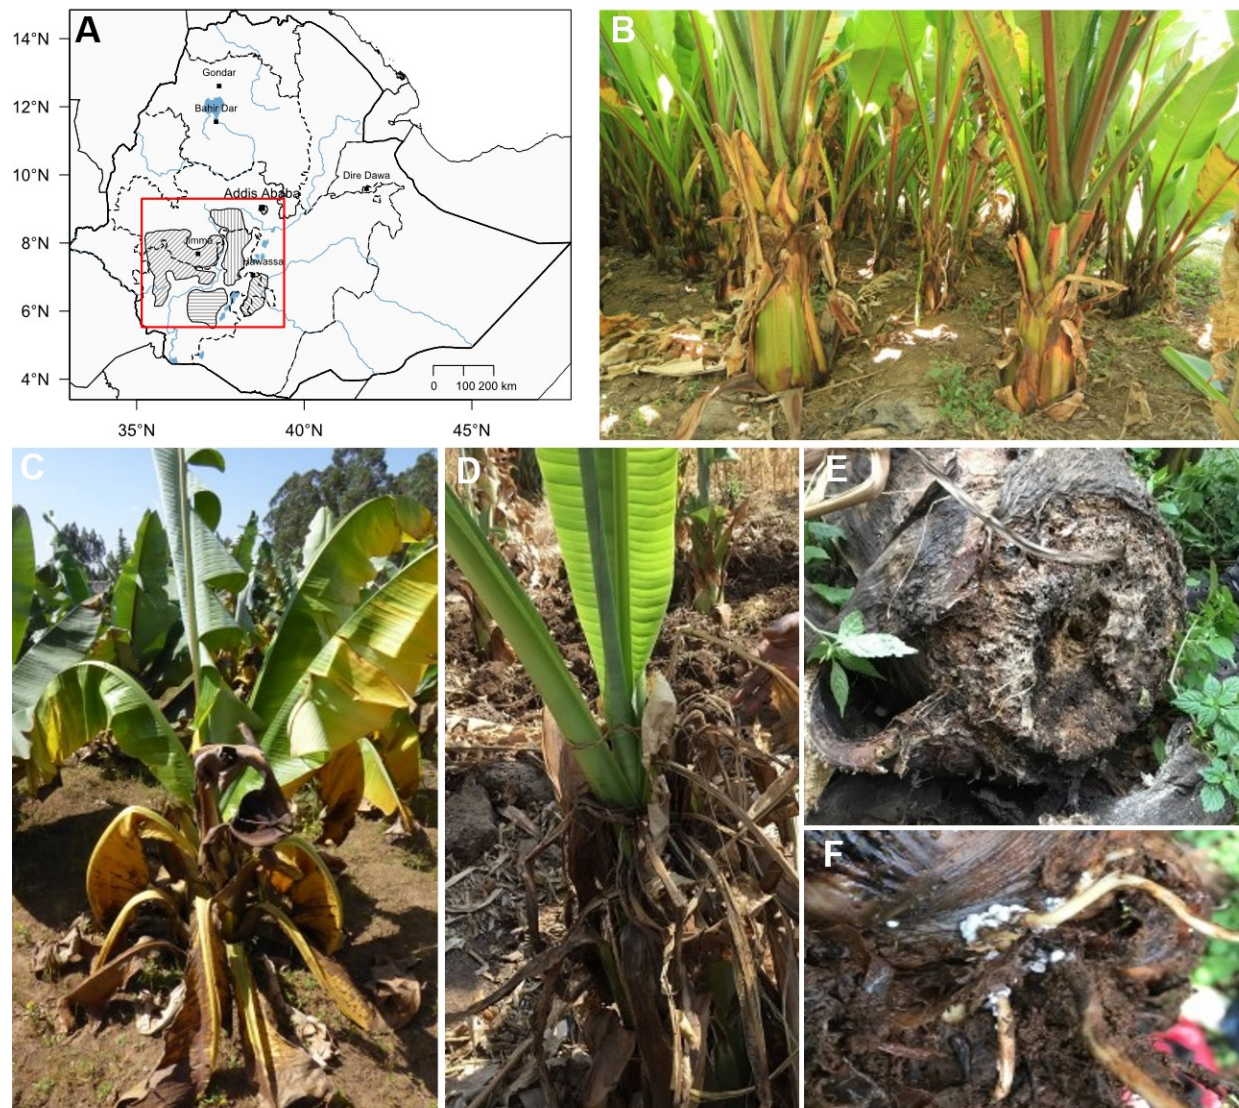

**Figure 1. Study area and major enset pests and pathogens in Ethiopia.** A) Map of Ethiopia, with shaded polygons denoting main regions of enset agriculture and red boundary indicating the extent of our study area. B) Typical enset plot. C) Enset with symptoms of Enset Xanthomonas Wilt (EXW). D) Enset of landrace 'Badadet' apparently recovering from severe EXW. E) Enset with evidence of corm rot. F) Root mealybugs on enset corm and roots.

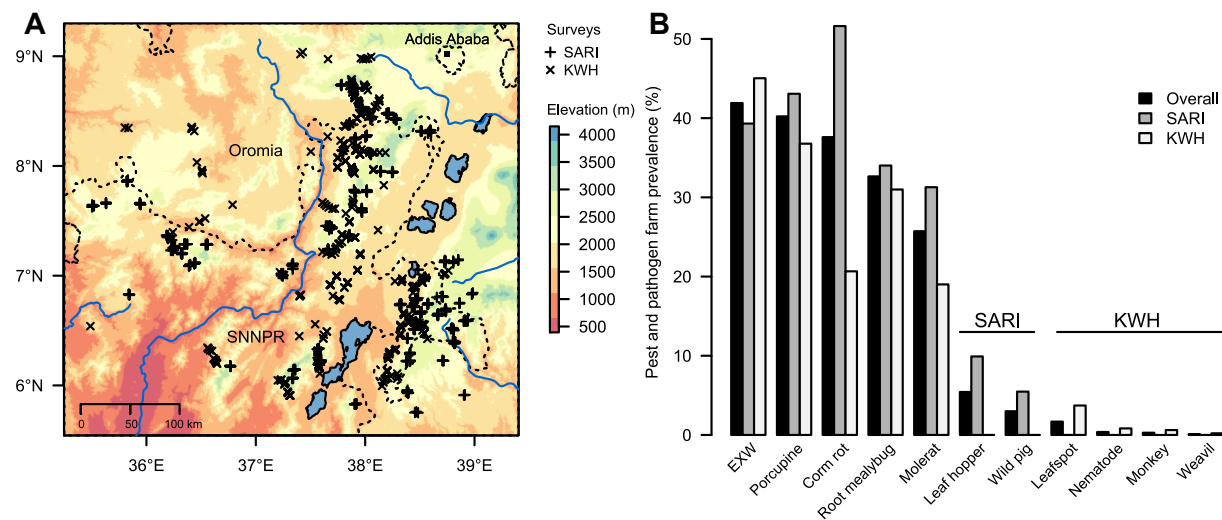

**Figure 2. Summary of enset pest and pathogen surveys.** A) Spatial distribution of the two independent enset pest and pathogen surveys analysed in this study. B) Percentage of farm surveys that recorded each of 11 enset pests and pathogens.

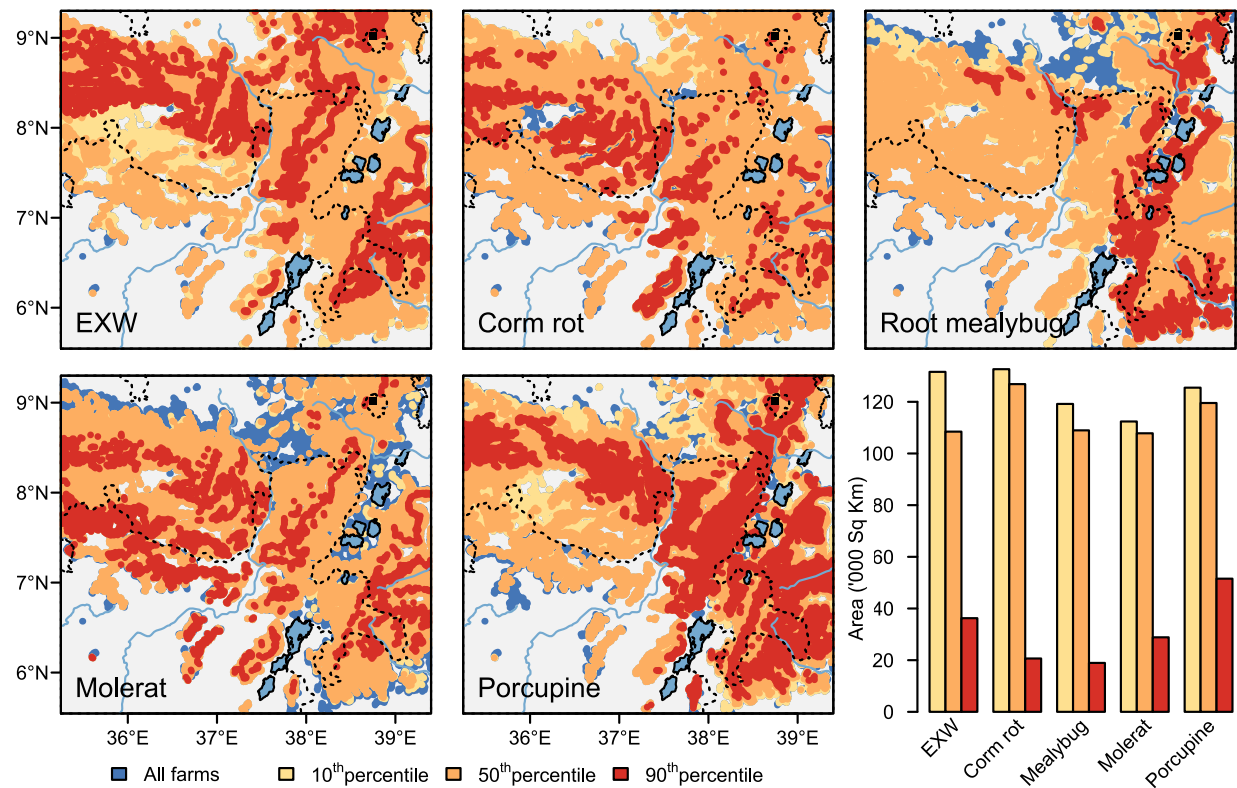

**Figure 3. Distribution maps of five major enset pests and pathogens.** Colour scales depict quantiles of pest and pathogen prevalence in farm survey clusters. Barchart depicts the area ('000 km<sup>2</sup>) of pest and pathogen occurrence at each prevalence quantile.

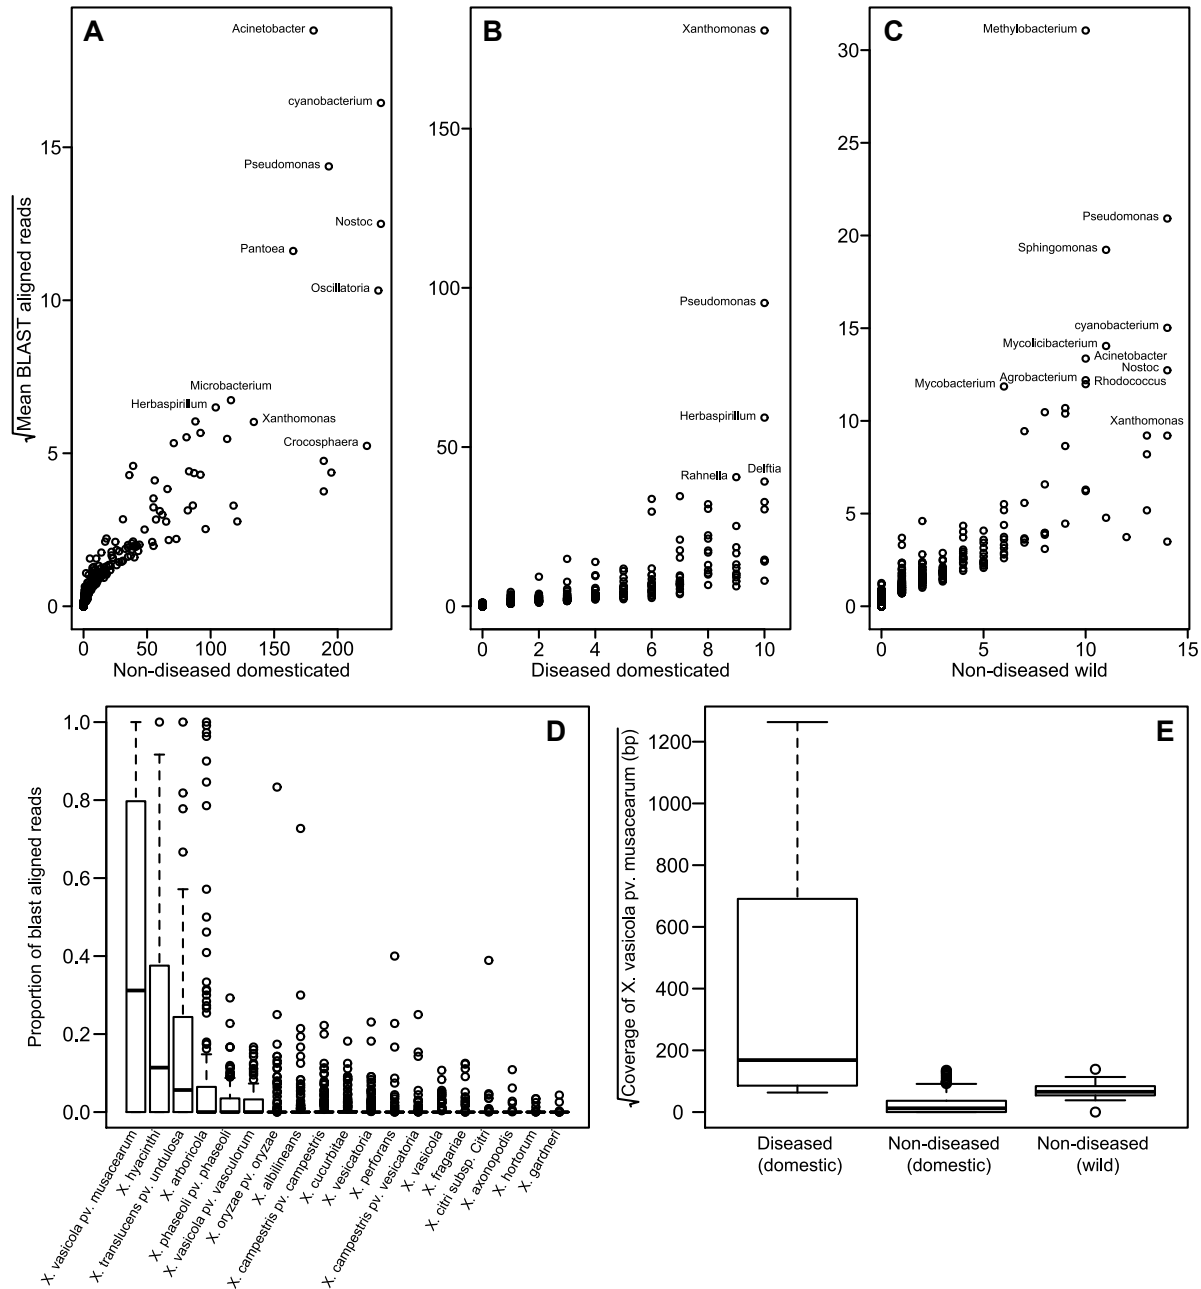

**Figure 4. Enset leaf microbiome characterisation based on blast aligned raw genotyping-by-sequencing reads.** A-C) Microbial genera identified in diseased and non-diseased enset samples. D) Number of reads aligning to each of 19 *Xanthomonas* reference sequences. E) Total coverage of *Xanthomonas vasicola* pv. *musacearum* blast aligned reads for each enset sample, grouped by disease status and domestication.



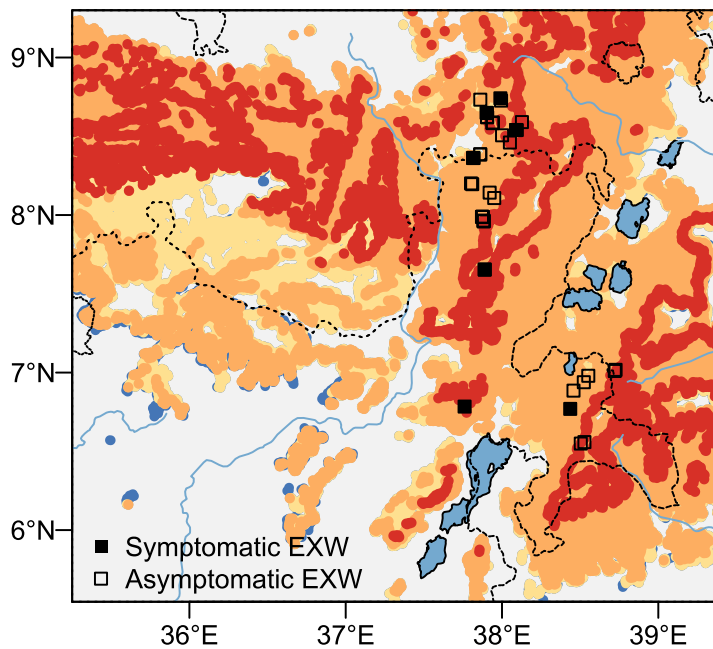

**Figure 5. Distribution of EXW symptomatic and asymptomatic onset samples in south west Ethiopia.** Background map is modelled onset distribution (Figure 3). The minimum *Xvm* read count in symptomatic samples was 4000. Here, we plot the 37 asymptomatic individuals with an equal or greater number of *Xvm* reads.
