# 1 The Distribution of Enset Pests and Pathogens and a 2 Genomic Survey of Enset Xanthomonas Wilt

3

4 Zerihun Yemataw<sup>1†</sup>, James S. Borrell<sup>2\*</sup>, Manosh Kumar Biswas<sup>3</sup>, Oliver White<sup>2</sup>,  
5 Wendawek Mengesha<sup>4</sup>, Sadik Muzemil<sup>1,5</sup>, Jaypal N. Darbar<sup>3</sup>, Ian Ondo<sup>2</sup>, Pat J.S.  
6 Heslop Harrison<sup>3</sup>, Guy Blomme<sup>6</sup>, Paul Wilkin<sup>2</sup>

7 †Joint first authors

8

9 \*Corresponding author: J. S. Borrell; E-mail: [J.borrell@kew.org](mailto:J.borrell@kew.org)

10 <sup>1</sup>Southern Agricultural Research Institute, Hawassa, Southern Nations Nationalities and  
11 Peoples Regional State, Ethiopia.

12 <sup>2</sup>Department of Natural Capital and Plant Health, Royal Botanic Gardens, Kew,  
13 Richmond, Surrey, TW9 3AE, UK

14 <sup>3</sup>Department of Genetics and Genome Biology, University of Leicester, LR1 7RH, UK

15 <sup>4</sup>Department of Biology, Hawassa University, Hawassa, Ethiopia

16 <sup>5</sup>School of Life Sciences, University of Warwick, Coventry CV4 7AL, UK

17 <sup>6</sup>Bioversity International, Addis Ababa office, c/o ILRI, P.O. Box 5689, Addis Ababa,  
18 Ethiopia

19

20

21

22

23 **Keywords:** Bacterial wilt, Enset Xanthomonas Wilt, food security, plant health, root  
24 mealybug, Xanthomonas Wilt of enset

## 25 **Abstract**

26 Mapping the distribution of crop pests and pathogens is essential to safeguard food  
27 security and sustainable livelihoods. However, these data are unavailable for many  
28 neglected and underutilised crops, particularly in developing countries. In Ethiopia, the  
29 world's largest historic recipient of food aid, the indigenous banana relative enset (*Ensete*  
30 *ventricosum*) is threatened by multiple pests and pathogens whilst providing the staple  
31 starch source for 20 million people. Foremost among these is *Xanthomonas* Wilt of enset  
32 (EXW), caused by *Xanthomonas vasicola* pv. *musacearum* (*Xvm*), a globally important  
33 disease of bananas (*Musa* sp.) that likely originated in enset. Here we collate 1069 farm  
34 surveys to map the distribution and relative prevalence of enset pests and pathogens  
35 across the entire enset growing region. We find that EXW is the most frequently  
36 encountered pathogen, and that farmers consistently ranked EXW as the most significant  
37 constraint on enset agriculture. Our surveys also showed that corm rot, and the pests root  
38 mealybug, mole rat and porcupine are all virtually ubiquitous. Finally, we apply  
39 genotyping-by-sequencing to the detection of *Xvm* and demonstrate that it is present even  
40 in asymptomatic domesticated and wild enset samples, suggesting that management of  
41 plants displaying symptoms alone may not be sufficient to reduce disease transmission.  
42 Holistic understanding of pests and pathogen distributions in enset may have significant  
43 benefits for both food security in Ethiopia, and preventing proliferation in related crops  
44 such as banana across central and east Africa.

45

## 46 Introduction

47 The increasing transmission of plant pests and pathogens has significant consequences  
48 for the distribution, quality and yield of crops (Bebber et al. 2014; Savary et al. 2019).  
49 Rural subsistence farmers appear particularly susceptible to these impacts, where  
50 emergence or outbreaks of pests and pathogens exacerbates existing food insecurity  
51 (Bruce 2010; Vurro et al. 2010) or hinders agricultural resilience (Heeb et al. 2019). Whilst  
52 global surveillance systems exist for pest and pathogens of major crops (Forum et al.  
53 2019), basic distribution, prevalence and incidence data is missing for many neglected  
54 and underutilized plants which are likely to become increasingly important in future  
55 diversified food systems (Borrell et al. 2019).

56 This paucity of monitoring data is a major challenge in Ethiopia where enset (*Ensete*  
57 *ventricosum* (Welw.) Cheesman), an indigenous banana relative, provides food security  
58 for 20 million people, but is threatened by multiple poorly documented pests and  
59 pathogens (Jones 2000, 2018; Blomme *et al.* 2017; Borrell *et al.* 2019). Enset cultivation  
60 is largely restricted to south and southwest Ethiopia (Figure 1A) where it is grown  
61 principally as a subsistence crop and for regional markets, and often comprises a  
62 significant proportion of total farm area (Borrell et al. 2020; Sahle et al. 2018). Enset is a  
63 monocarpic perennial that can grow for up to a decade before reaching maturity and is  
64 readily vegetatively propagated. Farmers maintain a cycle of plantings and transplantings  
65 of various ages that can be harvested at any time prior to flowering and senescence.  
66 Following harvest, the pseudostem and corm are pulped and fermented to provide a  
67 storable starch source (Tamrat et al. 2020). This flexible system enables farmers to buffer

68 seasonal food deficits, earning enset the moniker ‘the tree against hunger’ (Brandt et al.  
69 1997).

70 Enset production is affected by multiple pests and pathogens of varying severity (Table  
71 1, Figure 1). Important biotic constraints include Enset *Xanthomonas* Wilt (EXW, bacterial  
72 rots (*Erwinia* sp.) and root mealybugs (Blomme et al. 2017; Bogale et al. 2004; Addis,  
73 Azerefegne, Blomme, et al. 2008; Tewodros and Tesfaye 2014; Shank and Ertiro 1996).  
74 EXW is caused by *Xanthomonas vasicola* pv. *musacearum* (*Xvm*) (formerly *X. campestris*  
75 pv. *musacearum*). For clarity, in this manuscript we follow Studholme et al., 2019 and  
76 refer to the causal organism as *X. vasicola* pv. *musacearum*, except when discussing  
77 NCBI the reference genome which is still accessioned as *X. campestris* pv. *musacearum*.  
78 Mammal pests that directly damage the plants include porcupine, mole rats, wild pigs and  
79 monkeys (Bobosha 2003), and these are also suspected vectors of disease transmission,  
80 especially EXW, hence they are included in this study (Hunduma et al. 2015; Pers. Obs.  
81 J.S. Borrell).

82 Among these pests and pathogens, EXW is frequently cited as the most significant  
83 concern for farmers, generating a large number of studies that seek to identify tolerant or  
84 resistant enset landraces (Hunduma et al. 2015; G Welde-Michael et al. 2008; Yemataw et  
85 al. 2016; Muzemil et al. 2020; Haile et al. 2020) *Xvm* infects the vascular system of enset,  
86 damaging the harvestable tissue, causing permanent wilting and eventually death  
87 (Yemataw et al. 2017). It is known to be transmitted by contaminated tools and infected  
88 planting material, and potentially biotic vectors, such as wild and domesticated animals that  
89 browse part of the corm or pseudostem (Yemataw et al. 2017; Addis et al. 2010). In a  
90 previous study across 320 farms in eight districts, 40% of respondents reported EXW in

91 their field (McKnight-CCRP 2013), though this varied by region from 3.3% (Kembata  
92 Tembaro) to 95.7% (Gedeo), and the authors suggest that the true infection rate (farm  
93 prevalence) could be as high as 80%. Some authors claim that EXW has forced farmers  
94 to abandon enset production (Spring 1996; Tadesse et al. 2003). EXW is also speculated  
95 to be a possible driver for a reported major historic decline in enset agriculture in the North  
96 of Ethiopia (~200 years b.p.), though there is a lack of evidence to support or refute this  
97 (Brandt et al. 1997).

98 The causative agent of EXW was first described by Yirgou and Bradbury (1968) in  
99 Ethiopia. However symptoms consistent with EXW were reported as early as the 1930s  
100 (Castellani 1939; Studholme et al. 2019; Blomme et al. 2017), though it is not clear  
101 whether this represents emergence of the disease, or simply the first scientific  
102 documentation. During the 1960-80s the pathogen spread rapidly in enset and banana  
103 (*Musa* sp.) in Ethiopia (Yemataw et al. 2017) and is now a threat to smallholder banana  
104 cultivation throughout central and eastern Africa (Carter et al. 2010), impacting food  
105 security and rural livelihoods (Blomme et al. 2013, 2017). As a result, improved  
106 understanding of *Xvm*'s spatial distribution, intensity and impact on farmers is key to  
107 continued food security, as well as supporting translational research in enset and  
108 bananas (Merga et al. 2019). Two previous studies surveyed banana *Xanthomonas* wilt  
109 (BXW) in the East African highlands (not including Ethiopia) (Bouwmeester et al. 2016)  
110 and the risk of BXW more widely across Africa (Ocimati et al. 2019), but not at a resolution  
111 that is informative for disease mapping or management in Ethiopia, the putative origin of  
112 the disease.

113 Compared with *Xvm*/EXW, the distribution, prevalence and impact of other enset pests and  
114 pathogens has received much less attention. Enset corm rot is thought to be caused by  
115 *Erwinia* (or *Dickeya*) species (Blomme et al. 2017), but is poorly characterised. A survey  
116 by Yirgu (2016) in the Gamo Highlands found that a quarter of respondents considered  
117 corm rot to be the most severe disease of enset. Enset root mealybug (*Cataenococcus*  
118 *ensete* Williams and Matile-Ferrero) is known to be a locally important pest, with evidence  
119 that infestation retards growth, reduces pseudostem circumference and associated yields  
120 (Addis et al. 2008; Azerefegne et al. 2009). Addis (2005) reported that 30% of sampled  
121 farms were infected. Limited surveys of nematodes and weevils were undertaken by  
122 Bogale et al. (2004), which found relatively low nematode densities and did not find  
123 weevils. The banana weevil *Cosmopolites sordidus* does not thrive well above 1,600 m  
124 asl (Lescot 1988), and most enset cultivation zones are located at higher altitudes. Leaf  
125 hopper was found to be widespread in Yem special district, and associated with EXW  
126 prevalence (Zerfu et al. 2018). There remains the possibility of additional undescribed  
127 pathogens, in both wild and domesticated populations.

128 Here, we apply spatial and molecular methods to undertake the most extensive survey to  
129 date of the pests and pathogens affecting enset agriculture in Ethiopia, with a particular  
130 focus on detecting EXW. To achieve this, we first use region-wide farmer interviews and  
131 farm surveys to evaluate the relative abundance of pests and pathogens on enset farms,  
132 and farmer perceptions of the major constraints on enset agriculture. Second, we collate a  
133 suite of high-resolution environmental, topographic and socioeconomic variables for the  
134 study area and apply these to characterise the spatial distribution and prevalence of major  
135 enset pests and pathogens across the enset growing region. Finally, we apply a

136 genotyping-by-sequence approach to survey the leaf-associated microbiota of EXW-  
137 symptomatic and non-symptomatic enset samples, to assess detection efficacy of diseased  
138 versus incubating or asymptomatic *Xvm* and improve our understanding of EXW  
139 transmission. We discuss these data in the context of ongoing monitoring of pests and  
140 pathogens in a neglected food security crop, to support diagnosis, monitoring and  
141 management.

## 142 **Materials and Methods**

### 143 **Enset pests and pathogen surveys**

144 This study comprises observations from two region-wide surveys, conducted  
145 independently by i) the Southern Agricultural Research Institute between 2014-17  
146 (n=585), hereafter SARI and ii) a team from Royal Botanic Gardens Kew, Wolkite and  
147 Hawassa Universities 2017-20 (n=484), hereafter KWH. Both surveys were  
148 independently conceived, designed and carried out over a broadly similar geographic  
149 area (Figure 2A), using a similar methodology and as a result we are confident that  
150 comparing and combining these data make our conclusions more robust.

151 Both surveys were conducted by experienced teams together with local agricultural  
152 extension agents, and randomly selected individual farms over stratified sampling  
153 regions. Data was collected via individual interviews and direct on-farm participatory  
154 observations, and all diseases scored as presence or absence. Both surveys recorded  
155 the presence of five major pests and pathogens: EXW, root mealybug, corm rot, mole rat  
156 and porcupine, as well as estimating the number of enset plants with symptoms of EXW.  
157 The SARI survey additionally recorded leaf hoppers and wild pig damage, and asked

158 farmers to identify the most important constraint on enset production. The KWH survey  
159 additionally recorded nematodes, leafspot, monkey damage and weevils. Survey  
160 methodologies were broadly consistent; applying semi-structured interview, disease  
161 identification sheets and visual inspection of infected or damaged plants. The order in  
162 which diseases were presented, and the diagnostic photographs shown were varied to  
163 mitigate reporting bias. We also sought to document any symptoms of similar magnitude  
164 that were not attributed to known pests and diseases.

165 We calculated the relative prevalence of pests and pathogens to compare consistency  
166 across surveys. Where a pest or pathogen was only recorded in one survey, we record  
167 prevalence relative to the number of farms in that survey. Due to road accessibility and  
168 logistics, surveys were conducted unevenly through the year. Therefore, these data are  
169 not sufficiently robust for assessing seasonal trends, though we provide a summary of  
170 seasonality in Supplementary Materials (Figure S1). Finally, we grouped farms based on  
171 the top five farmer perceived constraints on enset agriculture and compared these with  
172 pests and pathogens prevalence.

### 173 **Spatial modelling of pest and pathogen prevalence**

174 We collated 41 high-resolution environmental, topographic and socioeconomic variables.  
175 Environmental variables were sourced from WorldClim (Fick and Hijmans 2017),  
176 ENVIREM (Title and Bemmels 2018) and CliMond (Kriticos et al. 2012), together with a  
177 90m SRTM DEM sourced from Jarvis et al. (2008). Slope, aspect, topographic position  
178 index and terrain roughness were calculated from elevation using the 'terrain' function in  
179 the R package Raster (Hijmans 2017). Socioeconomic variables were derived from  
180 OpenStreetMap (OpenStreetMap contributors 2015) and Gridded Population of the World



181 v4 (Center for International Earth Science Information Network 2017). All variables were  
182 resampled to 250m resolution, for consistency with the high-resolution topographic  
183 variables. A full list of variables is provided in Supplementary Materials, Table S1. Despite  
184 the resilience of our chosen analysis approach to highly correlated variables, to aid  
185 subsequent interpretation we removed 26 variables with very high collinearity using the  
186 function `vifcor` in 'usdm' ( $th=0.8$ ) (Naimi 2017; Lever et al. 2017). All analyses were  
187 conducted in R software (R Core team 2019).

188 To build robust models, we tested a range of cluster aggregation values to group farms  
189 by distance and sample size (see validation section), selecting a maximum aggregation  
190 distance of 4000m and  $\geq 3$  surveyed farms (Supplementary Materials, Figure S2). We  
191 chose a relatively fine scale aggregation due to the high environmental heterogeneity of  
192 southwest Ethiopia. Prevalence was calculated as the proportion of farms affected within  
193 a cluster. Observation clusters with  $<3$  surveyed farms were excluded from model  
194 building. Environmental variables were then extracted for each surveyed farm, and  
195 averaged by cluster.

196 To characterise the climatic niche of each enset pest and pathogen we used an approach  
197 similar to that of Pironon *et al.* (2019). First, principal component analysis (PCA) was  
198 performed on 100,000 systematically sampled points representing background climatic  
199 space of the study area. In these analyses, the first two principal components summarise  
200 the variation of the 15 retained variables. Second, we computed quantiles of pest and  
201 pathogen prevalence from our survey data corresponding to the 10<sup>th</sup>, 50<sup>th</sup> and 90<sup>th</sup>  
202 percentile. To characterise the niche occupied by a given pest or pathogen we plotted an  
203 alpha hull for each degree of pest and pathogen severity using the package 'alphahull'

204 with an alpha value of 1.05 (Pateiro-lopez 2019). This approach visualises the most  
205 severely affected farm clusters nested within the broader climatic space of surveyed  
206 farms. Climatic space polygons were then replotted in geographical space using the R  
207 packages 'raster' and 'rgeos' (Hijmans 2017; Bivand et al. 2018).

208 To provide an indication of the strength of association between environmental variables  
209 and our predicted pest and pathogen niches, we randomly sampled each variable across  
210 our four overlapping prevalence polygons (0, 0.1, 0.5 and 0.9) and estimated the Kendall  
211 rank correlation coefficient. We note that we did not estimate the significance of each  
212 association, as this would be strongly influenced by the number of random samples.  
213 Finally, we used the nicheOverlap function in the R package Dismo (Hijmans et al. 2017)  
214 to estimate niche overlap between modelled pest and pathogen distributions for 0.1 and  
215 0.9 prevalence quantiles.

## 216 **Model validation**

217 We used three approaches to validate our spatial analysis. First, we performed a  
218 sensitivity analysis by varying the aggregation distance and cluster threshold size of farm  
219 surveys, then assessing the change in predicted area as a response. Second, we  
220 modelled data from each survey separately and evaluated performance by comparing  
221 predicted area. Finally, for EXW we use a generalized linear model to test the hypothesis  
222 that aggregated survey points with greater disease prevalence also display greater  
223 disease severity in the number of infected plants.

## 224 **Diseased tissue sample collection and genotyping**

225 We collected leaf tissue samples from 10 enset individuals (multiple landraces),  
226 displaying EXW symptoms. This was complemented by 233 domesticated and 14 wild  
227 enset samples that did not display visible symptoms and were otherwise considered  
228 healthy. Samples were widely distributed across the study area, with a maximum of three  
229 from a single farm. Samples were principally collected for diversity analysis meaning they  
230 encompass a broad range of putatively genetically distinct landraces. Leaf tissue was  
231 silica dried, extracted using a standard CTAB protocol (Doyle & Doyle 1987), normalised  
232 and submitted to Data2Bio (IA, USA) for library preparation and tunable genotyping-by-  
233 sequencing (tGBS) following the protocol of Ott *et al.* (2017). DNA samples were digested  
234 with the restriction enzymes NspI and BfcCI/Sau3AI before being sequenced using an  
235 Ion Proton platform.

## 236 **Identification of candidate bacterial sequences**

237 We screened all samples for putative bacterial sequences by implementing a local blast  
238 search (Camacho *et al.* 2009) against a custom database of bacterial genome sequences  
239 created using NCBI Reference Sequences (RefSeq; O'Leary *et al.* 2016). Specifically, we  
240 downloaded all complete bacterial genomes classified as “reference” or “representative”  
241 resulting in a dataset comprised of 3,000 assemblies (date accessed 12<sup>th</sup> June 2020;  
242 Supplementary Table 2). In addition, we included genome sequences for *Xanthomonas*  
243 *campestris* pv. *musacearum* (GenBank accession: GCA\_000277875.1) and  
244 *Xanthomonas vasicola* pv. *vasculorum* (GCA\_003015715.1). *Xanthomonas campestris*  
245 pv. *musacearum* was used as it is the causal agent of bacterial wilt in enset and banana  
246 which has recently been reclassified as *X. vasicola* pv. *musacearum* (Aritua *et al.* 2008).

247 *Xanthomonas vasicola* pv. *vasculorum* was included as it is a close relative of *Xvm* yet is  
248 non-pathogenic in banana (Wasukira et al. 2012).

249 Prior to the blast search, raw tGBS sequencing reads were quality filtered using  
250 Trimmomatic (Bolger et al. 2014). Duplicate sequences were filtered from our samples  
251 using CD-HIT (Fu et al. 2012). A blastn search of tGBS reads was performed against the  
252 custom bacterial genome refseq dataset with 10 maximum target sequences, one  
253 maximum high-scoring segment pair (HSP) and an expectation value (E) of  $1 \times 10^{-25}$ . The  
254 taxonomy of a query sequence was defined using a “best sum bitscore” approach, where  
255 the bitscores for each subject taxonomy identified are summed and the taxonomy with  
256 the greatest score is selected. Where more than one taxonomy has the greatest sum  
257 bitscore no taxonomy is defined. This avoids ambiguous assignment with multiple closely  
258 related taxa in the blast database. Our approach was adapted from the methodology of  
259 blobtools2 (Challis et al. 2020) which was not appropriate for our analyses as it does not  
260 distinguish subspecific taxonomic ranks (i.e. pathovars).

261 For an overview of the bacteria present in and/or on leaf tissue, we first counted  
262 sequences assigned to each genus or species in our blast dataset. Taxa were scored as  
263 present in an individual if we identified >5 matching reads for that sample. To provide a  
264 sequence-depth independent estimate, we then calculated the base pair coverage of the  
265 *X. vasicola* pv. *musacearum* genome that was identified in our blast search. To do this,  
266 overlapping blast hits for *X. vasicola* pv. *musacearum* in each sample were merged using  
267 bedr in R (R Core team 2019) and total base pair coverage was calculated. We plotted  
268 these data in putative groupings comprising diseased, non-diseased and wild samples,  
269 and applied Analysis of Variance (ANOVA) and Tukey HSD post-hoc tests to assess

270 differences between groups. Custom scripts used for the blast search, taxonomic  
271 identification and coverage estimation are available from [https://github.com/o-william-](https://github.com/o-william-white/Enset_tGBS)  
272 [white/Enset\\_tGBS](https://github.com/o-william-white/Enset_tGBS).

## 273 **Results**

### 274 **Farm and farmer surveys**

275 A total of 1069 farms were assessed across two survey campaigns (Figure 2A). Overall,  
276 EXW was the most frequently recorded pest or pathogen, occurring in 41.2% of farms  
277 with porcupine (40.2%) and corm rot (37.6%) also similarly abundant (Figure 2B). In a  
278 comparison between surveys, corm rot, followed by porcupine and EXW was most  
279 frequently encountered by SARI, whereas EXW, followed by porcupine and root  
280 mealybug was most frequently encountered by HWK. Whilst the study area was largely  
281 consistent, the distribution of survey effort across months differed between surveys, with  
282 the majority of SARI survey effort in November-December and HWK in October and  
283 January-April (Supplementary Materials, Figure S1). Of 577 farmer responses, 507 (88%)  
284 reported pests and pathogens as the predominant constraint on enset agriculture (Table  
285 2). Of the remainder, 34 respondents reported no major constraint and others cited eight  
286 additional abiotic constraints at low frequency, including drought, land shortage, frost and  
287 labour shortage. Farmer perception of the predominant constraint on enset agriculture  
288 was highly consistent with the frequency at which pest and pathogens were recorded on  
289 farms (Table 2).

### 290 **Spatial modelling of pests and pathogens**

291 We computed the niche space for the five major pest and pathogen species with sufficient  
292 data and projected these into geographical space (Figure 3). Estimation of Kendall rank  
293 correlation coefficients between environmental variables and modelled pest and  
294 pathogen prevalence quantiles identified different suites of variables for each species  
295 (Table 3). EXW was positively associated with continentality and negatively associated with  
296 the maximum temperature of the coldest month and potential evapotranspiration (PET)  
297 of the coldest quarter. Corm rot was negatively associated with multiple PET variables  
298 and root mealybug was negatively associated with isothermality and cold quarter  
299 precipitation. Pairwise niche overlap at the 0.9 prevalence quantile was highest for EXW  
300 – porcupine and EXW – corm rot respectively (Table 4).

### 301 **Validation**

302 We plotted the predicted area for each of the five species (at 0.5 and 0.9 disease  
303 prevalence quantiles) across a range of cluster aggregation distances and cluster  
304 minimum sizes (Supplementary Materials, Figure S3). These show that predicted areas  
305 for most species stabilize at 4000m and clusters of 3 or more farms. At very high cluster  
306 values (>7), the predicted area declined, which we attribute to declining sample sizes  
307 reducing our ability to predict across climatic space. Comparison of models derived from  
308 each survey individually showed a significant correlation in predicted area ( $F_{1,13} = 115$ ,  
309  $R^2 = 0.89$ ,  $p = <0.001$ ) (Supplementary Materials, Figure S4). Finally, we report a highly  
310 significant relationship between the proportion of farm clusters reporting EXW and the  
311 mean count of EXW infected enset ( $F_{1,18} = 1.78$ ,  $p = 0.008$ ) (Figure S5).

### 312 **Genetic survey of EXW**

313 In a large sample of visibly non-diseased domesticated plants, bacteria of the genera  
314 *Acinetobacter*, *Cyanobacterium*, and *Pseudomonas* were most abundant, whilst *Nostoc*  
315 and *Oscillatoria* were less abundant but recorded in a high proportion of individuals  
316 (Figure 4A). A similar, but more diverse and abundant assemblage was recorded in visibly  
317 non-diseased wild plants, including the genera *Methylobacterium* and *Sphingomonas*  
318 (Figure 4C). We note that whilst *Methylobacterium* has been reported as a frequent  
319 laboratory contaminant (Salter et al. 2014), here it is largely localised to wild samples  
320 extracted using multiple kits and sequenced on different plates, suggesting this is a valid  
321 finding. By contrast, the diseased domesticated sample group was characterised by a  
322 very high mean number of reads of *Xanthomonas*, present in all samples (Figure 4B). It  
323 is noteworthy, however, that reads corresponding to *Xanthomonas* were also identified in  
324 >57% of non-diseased domesticated samples and >86% of wild samples. Of the 19  
325 *Xanthomonas* reference genomes in our blast database, *X. campestris* pv. *musacearum*  
326 (i.e. *Xvm*) was the most frequently identified species (Figure 4D). Finally, retaining only  
327 reads aligning to *Xvm*, we calculated the coverage of the blast hits against the genome  
328 for each sample and plotted these by group (Figure 4E). The recovered sequence length  
329 significantly differed across groups ( $F_{(2,254)}=46.2$ ,  $P<0.001$ ), despite no significant  
330 difference in raw read counts between the three groups ( $F_{(2,254)} = 1.08$ ,  $p = 0.34$ ). A Tukey  
331 post-hoc test indicated significant *Xvm* genome coverage differences between the  
332 domesticated and diseased groups ( $p < 0.001$ ) and wild and diseased groups ( $p < 0.001$ ).  
333 However, there was no significant difference between wild and domesticated ( $p = 0.99$ ).  
334 Of 233 asymptomatic domesticated plant samples, 36 (15%) reported a count of *Xvm*  
335 aligning reads equal to or higher than an EXW symptomatic sample. A further 150 (64%)

336 plants reported a non-zero number of *Xvm* aligning reads. We plot the distribution of our  
337 diseased reference plants and the 36 asymptomatic plants with an equal, or higher  
338 number of *Xvm* reads in Figure 5.

## 339 **Discussion**

340 The distribution and intensity of pests and pathogens in neglected and underutilised crop  
341 species is often poorly known, limiting the effectiveness of mitigation strategies (Bebber  
342 et al. 2019). In this study we collate 1069 farm surveys to provide the most detailed  
343 analysis to date of the distribution and prevalence of pest and pathogens on enset farms  
344 in Ethiopia, together with the perceptions of enset farmers, to develop a baseline from  
345 which to assess future trends.

### 346 **Farmer surveys**

347 The most frequently recorded pest or pathogen was EXW, occurring on 42% of farms  
348 (Figure 2). This is consistent with multiple previous reports emphasising the importance  
349 of EXW as a constraint to enset agriculture (Shimelash et al. 2008; Merga et al. 2019;  
350 Wolde et al. 2016). However, we found that other much less studied pests and pathogens  
351 are also virtually ubiquitous across the enset growing region. Corm rot and root mealybug  
352 were reported on 37.6% and 32.6 % of farms respectively. Whilst we know that both EXW  
353 and corm rot can result in loss of whole plants, the associated reduction in yield due to  
354 mealybug infestation is not known.

355 Despite large sample sizes, we observed differences in disease prevalence between the  
356 two surveys. These may be attributed to a number of causes, particularly survey timing  
357 and variation of disease prevalence across overlapping survey areas. Though our



358 sampling strategy was not designed to ascertain seasonal trends (and so must be used  
359 with caution for this purpose), we note that SARI performed a large number of surveys in  
360 November and December, a period shortly after the long rainy season in which we see  
361 an increase in the number of corm rot observations (Supplementary materials, Figure S1).  
362 This may partly account for the disparity in corm rot observations. Observations for EXW,  
363 root mealybug and porcupine were largely consistent between surveys. These  
364 comparisons emphasise the value of multiple independent surveys, particularly where  
365 pathogens are poorly known and may be cryptic.

366 Our findings are consistent with farmer perceptions, with over 40% reporting EXW to be  
367 the primary constraint on enset agriculture (Table 2). However, only 71% of farmers that  
368 report EXW as the primary constraint were found to have EXW on their farms. This is in  
369 contrast with farmers who reported other pests and pathogens as their primary constraint,  
370 where our surveys found the reported pest or pathogen present on the farm >97% of the  
371 time. Therefore, EXW is considered a greater constraint by farmers than would be  
372 assumed from its frequency alone. This could be due to the potentially devastating impact  
373 of EXW, and the risk of greater livelihood and food security consequences than from other  
374 pests and pathogens (Azerefegne *et al.* 2009; Savary *et al.* 2012; Borrell *et al.* 2019). For  
375 banana farmers in East and Central Africa, Banana Xanthomonas Wilt (BXW) is also  
376 ranked above other pests and pathogens (Tushemereirwe *et al.* 2006; Blomme *et al.*  
377 2017).

378 The prevalence of EXW on Ethiopian enset farms is similar or slightly less severe than  
379 published reports of BXW elsewhere in east Africa. In a large survey in Uganda, Nakato  
380 *et al.* (2016) recorded BXW in 69-75% of farms, and in Rwanda, Uwamahoro *et al.* (2019)

381 found prevalence varied from 26-82% of farms. If EXW is indeed less prevalent, it is  
382 possible that a) enset is less susceptible to *Xvm*, b) its presence for nearly a century has  
383 helped farmers select for a larger proportion of tolerant landraces, c) the lack of insect-  
384 vectored transmission with enset reduces observed prevalence and especially incidence  
385 and/or d) another factor such as environment or cultural practice reduces disease  
386 prevalence. Relatively few surveys in Ethiopia have focused on BXW, to provide a  
387 comparison, though a study by Shimelash *et al.* (2008) reported that the number of  
388 infected plants varied from ~2-40% across a series of sampling sites stratified by  
389 elevation. Major banana growing regions in Ethiopia (e.g. Arba Minch) are largely spatially  
390 and altitudinally isolated from the principal area of enset cultivation, which may have  
391 served to limit the incidence of *Xvm* in lowland banana production zones.

## 392 **Distribution of pest and pathogens**

393 We modelled the distribution of five major pest and pathogens and found all to be virtually  
394 ubiquitous across the survey area (Figure 3). This helps explain why previous studies  
395 have found it challenging to identify hotspots in pathogens such as EXW (Wolde *et al.*  
396 2016; Brandt *et al.* 1997). Our observations were largely consistent across a range of  
397 parameters and both independent surveys (Figures S3, S4). Despite the broad  
398 distribution of most pests and pathogens, we did observe variation in relative disease  
399 prevalence consistent with our limited knowledge on pest and pathogen ecology. For  
400 example, the most severely affected regions for Root mealybug appear to be low lying  
401 areas along the Great Rift Valley, consistent with reports that mealybugs are most  
402 common in moist, humid localities and that they can be dispersed via flooding events  
403 (Azerefege *et al.* 2009). Similarly, we show that corm rot is negatively correlated with

404 drier localities (higher potential evapotranspiration) which are likely to be less amenable  
405 to bacterial multiplication. EXW was more weakly associated with multiple environmental  
406 variables, the most important being maximum temperatures and potential  
407 evapotranspiration in the coldest quarter. Interestingly, EXW was most strongly positively  
408 associated with Continentality (average temperature of the warmest month, minus coldest  
409 month). Higher Continentality values are typical of areas where domesticated has  
410 expanded beyond the range of wild enset.

411 Additional unmeasured variables are also likely to be important in refining these models  
412 and our understanding of enset disease ecology. For example, the wide diversity of  
413 cultural practices may regionally facilitate or hinder control of pests or transmission of  
414 pathogens. Whilst we did not find that 'distance to roads' was a strong predictor as might  
415 have been expected for pathogens such as EXW and root mealybug that can be  
416 transmitted through planting materials, other socioeconomic variables such as farm  
417 density or the proportion of enset in the local crop mix, may be important. Whilst some  
418 data on the prevalence of enset agriculture is available (Borrell et al. 2020), these data  
419 are not at a sufficiently high resolution to be analytically tractable. Pests and pathogens  
420 may also vary in their ecology and virulence (Goss and Bergelson 2006). For example,  
421 researchers screening enset landraces for *Xvm* tolerance have reported varying virulence  
422 across *Xvm* isolates (Muzemil et al. 2020; Merga et al. 2019; G Welde-Michael et al.  
423 2008). Finally, while our data captures pest and pathogen farm-level prevalence, it does  
424 not quantify disease incidence or severity i.e. the impact on yield or livelihoods. Future  
425 surveys focused on quantifying yield reduction would complement this work.

426 **Evidence of EXW in asymptomatic plants**

427 In this study, we are confident that we have detected *X. vasicola* pv. *musacearum* in  
428 'diseased' samples as they display the known disease phenotype and a large number of  
429 reads blast align to the *Xvm* genome sequence (Figure 4). Surprisingly, we also detected  
430 a significant number of *Xvm* reads in asymptomatic domesticated and wild enset plant  
431 samples. There are three possible explanations for this observation. First, a subset of  
432 landraces may display some tolerance or resistance meaning that the pathogen can be  
433 present without causing symptoms. Second, we may be detecting a non-pathogenic or  
434 closely related *Xanthomonas* pathovar in our asymptomatic samples (Alemayehu et al.  
435 2016). This is supported by the fact that variation in the pathogenicity of different strains  
436 has been reported previously (G Welde-Michael et al. 2008; Merga et al. 2019; Muzemil  
437 et al. 2020; Haile et al. 2020). Finally, it is possible that we are detecting *Xvm* during the  
438 incubation period. The incubation period in enset appears to be longer than in *Musa*,  
439 though this depends on the infected landrace, entry point of the pathogen, inoculum level  
440 and age of the plants (Ocimati et al. 2013; G. Welde-Michael et al. 2008; G Welde-Michael  
441 et al. 2008). In this case we would conclude that *Xvm* is present, and may eventually  
442 cause symptoms. We note that long term latent infections have been reported in East  
443 african bananas (Ocimati et al. 2013). It is also noteworthy that we detect *Xvm* in wild  
444 enset, which is consistent with reports by Alemayehu *et al.* (2016) of wild enset  
445 susceptibility. However unlike Alemayehu *et al.*, throughout our extensive fieldwork we  
446 have not observed a wild enset plant displaying EXW symptoms and it is not clear how  
447 *Xvm* could cross generations in a wild unmanaged population.

448 We consider it plausible that all three explanations may be responsible to varying  
449 degrees. Therefore, whilst we have likely detected *Xvm* during incubation in some

450 individuals, this probably does not explain detection of *Xvm* in nearly half of asymptomatic  
451 domesticated plants and nearly all wild plants. Therefore, tolerance of low levels of *Xvm*  
452 and the existence of latent infections, coupled with a possible wider diversity and varying  
453 pathogenicity of *Xvm* in enset agricultural systems, suggests that the overall distribution  
454 of this pathogen may have been underestimated.

### 455 **Current research gaps**

456 Building on the first region wide pest and pathogen distribution maps, we attempt to  
457 identify major outstanding research gaps. Firstly, whilst a growing number of studies are  
458 surveying putatively EXW tolerant or resistant enset landraces it remains to be  
459 understood why EXW appears to predominantly affect 4-5 year old plants (Wolde et al.  
460 2016) (or whether that is simply observation bias as these are likely to be the most  
461 common group demographically). Secondly, abiotic stress prior to infection can  
462 predispose plants to pathogen susceptibility (Bostock et al. 2014). It is possible that  
463 susceptibility to EXW is exacerbated by abiotic stress, such as drought or cold shock,  
464 though the underlying processes may be much more complex (Neil et al. 2017). It would  
465 be worthwhile to identify a stratified sample of farms for continued repeat EXW surveys  
466 to understand seasonality patterns in severity. Similarly, transmission may be higher  
467 under certain environmental conditions. Shimwela *et al.* (2016) reported higher BXW  
468 incidence during the rainy season, attributed to higher water levels in plant tissue  
469 favouring bacteria development. This suggests that transmission can also be higher in  
470 wet conditions as inoculum levels may be elevated (Blomme et al. 2017), and tool use  
471 increases for management reasons. Finally, we have not addressed potential  
472 interactions, for example, whether root mealybug infestation makes enset more

473 susceptible to EXW, or facilitates entry of the pathogen into the roots or corm. However  
474 we note the strong niche overlap between porcupine (as a putative vector) and both EXW  
475 and corm rot (Table 4).

## 476 **Conclusions**

477 In conclusion, farmers clearly consider EXW to be the predominant constraint on enset  
478 agriculture. Their concern may be justified based on evidence presented here that *Xvm*  
479 is more widespread and prevalent than previously recognised, partly explaining the  
480 propensity of EXW to appear unexpectedly. In a regional context, *Xvm* it can be  
481 considered one of the most important and widespread disease of *Musa* in East and  
482 Central Africa with significant economic and food security impacts. Whilst EXW has  
483 proven to be a substantial challenge for effective disease management in small scale  
484 farming settings, comparatively less research has been undertaken on corm rot and root  
485 mealybug, which our data demonstrates are similarly widespread and prevalent. Whilst  
486 they may not have the potential severity of EXW, they may cumulatively have a significant  
487 impact on overall yields and food security. Despite the significant challenges that  
488 pathogens such as *Xvm* pose, enset agriculture is rich in indigenous knowledge,  
489 genetically diverse landraces and a wide range of agronomic practices; significantly more  
490 so than in the introduced (in Ethiopia) genetically depauperate and agronomically uniform  
491 *Musa* crop, which predominantly focusses on the Cavendish dessert banana types. This  
492 suggests that further research in enset may have translational benefits for related species  
493 in Ethiopia and beyond.

## 494 **Acknowledgements**

495 We thank the Southern Agricultural Research Institute for providing logistical support, and  
496 numerous agricultural extension agents for facilitating fieldwork.

## 497 **Funding**

498 The Global Challenges Research Fund, Foundation Awards for Global Agricultural and  
499 Food Systems Research, entitled, 'Modelling and genomics resources to enhance  
500 exploitation of the sustainable and diverse Ethiopian starch crop enset and support  
501 livelihoods' [Grant No. BB/P02307X/1]; The European Community Horizon 2020 grant  
502 Project ID 727624, " Microbial uptake for sustainable management of major banana  
503 pests and diseases (MUSA)" and The McKnight foundation.

## 504 **Author Contributions**

505 ZY, JB, WM and SM performed field surveys and collated data. JB designed and  
506 performed spatial analysis with contributions from IO. MB and JD sequenced enset  
507 tissue samples and OW processed and analysed sequence data. JB wrote the first draft  
508 of the manuscript and produced the figures. All authors contributed to and approved the  
509 final version of the manuscript.

510

511

512

513

## 514 Literature Cited

- 515 Addis, T. 2010. Biology, Geographical Distribution, Prevention and Control of the Enset Root  
516 Mealybug, *Cataenococcus ensete* (Homoptera: Pseudococcidae) in Ethiopia. *Tree For. Sci.*  
517 *Biotechnol.* 8:251–260.
- 518 Addis, T., Azerefegne, F., and Blomme, G. 2008. Density and distribution on enset root  
519 mealybugs on enset. *African Crop Sci. J.* 16:67–74.
- 520 Addis, T., Azerefegne, F., Blomme, G., and K. Kanaujia. 2008. Biology of the Enset Root  
521 Mealybug *Cataenococcus ensete* and its Geographical Distribution in Southern Ethiopia. *J.*  
522 *Appl. Biosci.* 8:251–260.
- 523 Addis, T., Turyagyenda, L. F., Alemu, T., Karamura, E., and Blomme, G. 2010. Garden tool  
524 transmission of *Xanthomonas campestris* pv. *musacearum* on banana (*Musa* spp.) and enset in  
525 Ethiopia. *Acta Hortic.* 879:367–372.
- 526 Alemayehu, C., Tadesse, K., and Guy, B. 2016. Natural occurrence and pathogenicity of  
527 *Xanthomonas* bacteria on selected plants. *African J. Biotechnol.* 15:2146–2155 Available at:  
528 <http://academicjournals.org/journal/AJB/article-abstract/B6B571E60675>.
- 529 Aritua, V., Parkinson, N., Thwaites, R., Heeney, J. V, Jones, D. R., Tushemereirwe, W., et al.  
530 2008. Characterization of the *Xanthomonas* sp . causing wilt of enset and banana and its  
531 proposed reclassification as a strain of *X . vasicola*. :170–177.
- 532 Azerefegne, F., Addis, T., Alemu, T., Lemawork, S., Tadesse, E., Gemu, M., et al. 2009. *An IPM*  
533 *guide for Enset root mealybug (Cataenococcus ensete) in Enset production*.
- 534 Bebbler, D. P., Field, E., Gui, H., Mortimer, P., Holmes, T., and Gurr, S. J. 2019. Many  
535 unreported crop pests and pathogens are probably already present. *Glob. Chang. Biol.*  
536 25:2703–2713.
- 537 Bebbler, D. P., Holmes, T., and Gurr, S. J. 2014. The global spread of crop pests and  
538 pathogens. *Glob. Ecol. Biogeogr.* 23:1398–1407.
- 539 Bivand, R., Stuetz, R., Ove, K., Giraudoux, P., Davis, M., and Santilli, S. 2018. Package ‘rgeos  
540 .’ Available at: <https://cran.r-project.org/web/packages/rgeos/rgeos.pdf>.
- 541 Blomme, G., Dita, M., Jacobsen, K. S., Pérez Vicente, L., Molina, A., Ocimati, W., et al. 2017.  
542 *Bacterial Diseases of Bananas and Enset: Current State of Knowledge and Integrated*  
543 *Approaches Toward Sustainable Management*. *Front. Plant Sci.* 8:1–25 Available at:  
544 <http://journal.frontiersin.org/article/10.3389/fpls.2017.01290/full>.
- 545 Blomme, G., Ploetz, R., Jones, D., De Langhe, E., Price, N., Gold, C., et al. 2013. A historical  
546 overview of the appearance and spread of *Musa* pests and pathogens on the African continent:  
547 Highlighting the importance of clean *Musa* planting materials and quarantine measures. *Ann.*  
548 *Appl. Biol.* 162:4–26.
- 549 Bobosha, K. 2003. Characterization of *Xanthomonas campestris* pv *musacearum* isolates:  
550 causal agent of enset bacterial wilt disease.
- 551 Bogale, M., Mekete, T., and Protection, P. 2004. Survey of Plant Parasitic Nematodes and  
552 Banana Weevil. *Nematol. Mediterr.* 32:223–227 Available at: [http://www.inaav.ba.cnr.it/vol32-2,](http://www.inaav.ba.cnr.it/vol32-2,2004/vol32-2o.pdf)  
553 [2004/vol32-2o.pdf](http://www.inaav.ba.cnr.it/vol32-2,2004/vol32-2o.pdf).



- 554 Bolger, A. M., Lohse, M., and Usadel, B. 2014. Trimmomatic: A flexible trimmer for Illumina  
555 sequence data. *Bioinformatics*. 30:2114–2120.
- 556 Borrell, J. S., Biswas, M. K., Goodwin, M., Blomme, G., Schwarzacher, T., Heslop-Harrison, P.  
557 J. S., et al. 2019. Enset in Ethiopia: a poorly characterised but resilient starch staple. *Ann. Bot.*  
558 123 (5):747–766.
- 559 Borrell, J. S., Dodsworth, S., Forest, F., Perez-Escobar, O. A., Lee, M. A., Mattana, E., et al.  
560 2019. The climatic challenge: Which plants will people use in the next century? *Environ. Exp.*  
561 *Bot.* 170.
- 562 Borrell, J. S., Goodwin, M., Blomme, G., Jacobsen, K., Wendawek, A. M., Gashu, D., et al.  
563 2020. Enset based agri-systems in Ethiopia: A systematic review of production trends,  
564 agronomy, processing and the wider food security applications of a neglected banana relative.  
565 *Plants, People, Planet.* 00:1–17.
- 566 Bostock, R. M., Pye, M. F., and Roubtsova, T. V. 2014. Predisposition in Plant Disease:  
567 Exploiting the Nexus in Abiotic and Biotic Stress Perception and Response. *Annu. Rev.*  
568 *Phytopathol.* 52:517–49.
- 569 Bouwmeester, H., Heuvelink, G. B. M., and Stoorvogel, J. J. 2016. Mapping crop diseases using  
570 survey data: The case of bacterial wilt in bananas in the East African highlands. *Eur. J. Agron.*  
571 74.
- 572 Brandt, S. A., Spring, A., Hiebsch, C., McCabe, J. T., Tabogie, E., Wolde-Michael, G., et al.  
573 1997. The “Tree Against Hunger”: Enset-based Agricultural System in Ethiopia. *Adv. Sci.* :56.
- 574 Bruce, T. J. A. 2010. Tackling the threat to food security caused by crop pests in the new  
575 millennium. *Food Secur.* 2:133–141.
- 576 Camacho, C., Coulouris, G., Avagyan, V., Ma, N., Papadopoulos, J., Bealer, K., et al. 2009.  
577 BLAST+: Architecture and applications. *BMC Bioinformatics*. 10:1–9.
- 578 Carter, B. A., Reeder, R., Mgenzi, S. R., Kinyua, Z. M., Mbaka, J. N., Doyle, K., et al. 2010.  
579 Identification of *Xanthomonas vasicola* (formerly *X. campestris* pv. *musacearum*), causative  
580 organism of banana xanthomonas wilt, in Tanzania, Kenya and Burundi. *Plant Pathol.* 59:403.
- 581 Castellani, E. 1939. Su un marciume dell' ensete. *L'Agric. Colon. Firenze.* 33:297–300.
- 582 Center for International Earth Science Information Network, C. C. U. 2017. Gridded Population  
583 of the World, Version 4 (GPWv4): Population Count, Revision 10. Available at:  
584 <https://doi.org/10.7927/H4PG1PPM>.
- 585 Challis, R., Richards, E., Rajan, J., Cochrane, G., and Blaxter, M. 2020. BlobToolKit - Interactive  
586 Quality Assessment of Genome Assemblies. *G3 Genes, Genomes, Genet.* 10:g3.400908.2019.
- 587 Doyle, J., Doyle, J. L. 1987. Genomic plant DNA preparation from fresh tissue-CTAB method.  
588 *Phytochem Bull.* 19:11–15.
- 589 Fick, S. E., and Hijmans, R. J. 2017. WorldClim 2: new 1-km spatial resolution climate surfaces  
590 for global land areas. *Int. J. Climatol.* 37:4302–4315.
- 591 Forum, P. O., Carvajal-Yepes, M., Cardwell, K., Nelson, A., Garrett, K. A., Giovani, B., et al.  
592 2019. A global surveillance system for crop diseases. *Science (80-. )*. 364:1237–1239 Available  
593 at: <http://science.sciencemag.org/content/364/6447/1237.abstract>.
- 594 Fu, L., Niu, B., Zhu, Z., Wu, S., and Li, W. 2012. CD-HIT: Accelerated for clustering the next-

- 595 generation sequencing data. *Bioinformatics*. 28:3150–3152.
- 596 Goss, E. M., and Bergelson, J. 2006. Variation in resistance and virulence in the interaction  
597 between *Arabidopsis thaliana* and a bacterial pathogen. *Evolution* (N. Y). 60:1562–1573.
- 598 Haile, B., Fininsa, C., Terefe, H., Chala, A., and Hussien, S. 2020. Evaluation of enset (*Ensete*  
599 *ventricosum*) clones for resistance reaction against pathogenic *Xanthomonas campestris* pv.  
600 *musacearum* isolates from Southwestern Ethiopia. *Cogent Food Agric*. 6 Available at:  
601 <https://doi.org/10.1080/23311932.2020.1773094>.
- 602 Heeb, L., Jenner, E., and Cock, M. J. W. 2019. Climate - smart pest management : building  
603 resilience of farms and landscapes to changing pest threats. *J. Pest Sci.* (2004). 92:951–969  
604 Available at: <https://doi.org/10.1007/s10340-019-01083-y>.
- 605 Hijmans, R. J. 2017. raster: Geographic Data Analysis and Modeling. R package version 2.6-7.
- 606 Hijmans, R. J., Phillips, S., Leathwick, J., and Elith, J. 2017. dismo: Species Distribution  
607 Modeling. R package version 1.1-4.
- 608 Hunduma, T., Kassahun, S., Hilu, E., and Oli, M. 2015. Evaluation of Enset Clones Resistance  
609 against Enset Bacterial Wilt Disease (*Xanthomonas campestris* pv. *musacearum*). *J. Vet. Sci.*  
610 *Technol.* 06 Available at: <http://www.omicsonline.org/open-access/evaluation-of-enset-clones-resistance-against-enset-bacterial-wilt-disease-xanthomonas-campestris-pv-musacearum-2157-7579-1000232.php?aid=52024>.
- 613 Jarvis, A., Reuter, H. I., Nelson, A., and Guevara, E. 2008. Hole-filled SRTM for the globe  
614 Version 4, available from the CGIAR-CSI SRTM 90m Database. Available at:  
615 <http://srtm.csi.cgiar.org>.
- 616 Jones, D. R. 2000. *Diseases of Banana, Abacá and Enset*. Walingford, Reino Unido: CABI  
617 Publishing.
- 618 Jones, D. R. 2018. *Handbook of diseases of banana, abaca and enset*. CABI.
- 619 Kriticos, D. J., Webber, B. L., Leriche, A., Ota, N., Macadam, I., Bathols, J., et al. 2012.  
620 CliMond: Global high-resolution historical and future scenario climate surfaces for bioclimatic  
621 modelling. *Methods Ecol. Evol.* 3:53–64.
- 622 Lemawork, S., Azerefegne, F., Alemu, T., Addis, T., and Blomme, G. 2018. Hot water  
623 immersion disinfests enset ( *Ensete ventricosum* ) suckers from the enset root mealybug  
624 *Cataenococcus ensete* Williams and Matile-Ferrero. 13:1990–1997.
- 625 Lescot, T. 1988. Influence of altitude on populations of banana weevil (*Cosmopolites sordidus*  
626 Germar). *Fruits* (France). 43:433–437.
- 627 Lever, J., Krzywinski, M., and Altman, N. 2017. Principal component analysis. *Nat. Publ. Gr.*  
628 14:641–642 Available at: <http://dx.doi.org/10.1038/nmeth.4346>.
- 629 McKnight-CCRP. 2013. *“Integrated Management of Bacterial Wilt of Enset (*Ensete ventricosum**  
630 *(Welw.) Cheesman) caused by *Xanthomonas campestris* pv. *musacearum* in Ethiopia.*
- 631 Merga, I., Tripathi, L., Hvoslef-Eide, A., and Gebre, E. 2019. Application of Genetic Engineering  
632 for Control of Bacterial Wilt Disease of Enset , Ethiopia ’ s Sustainability Crop. *Front. Plant Sci.*  
633 10.
- 634 Muzemil, S., Chala, A., Tesfaye, B., Studholm, D. J., Grant, M., Yemataw, Z., et al. 2020.  
635 Evaluation of 20 enset (*Ensete ventricosum*) landraces for response to *Xanthomonas vasicola*

- 636 pv. musacearum infection. bioRxiv.
- 637 Naimi, B. 2017. Package 'usdm.'
- 638 Nakato, G. V., Beed, F., Bouwmeester, H., Ramathani, I., Mpiira, S., Kubiriba, J., et al. 2016.  
639 Building agricultural networks of farmers and scientists via mobile phones: case study of banana  
640 disease surveillance in Uganda. *Can. J. Plant Pathol.* 38:307–316 Available at:  
641 <https://doi.org/10.1080/07060661.2016.1230149>.
- 642 Neil, R., Miller, G., Sergio, G., Alves, C., and Sluys, M. Van. 2017. Plant immunity : unravelling  
643 the complexity of plant responses to biotic stresses. :681–687.
- 644 O’Leary, N. A., Wright, M. W., Brister, J. R., Ciufo, S., Haddad, D., McVeigh, R., et al. 2016.  
645 Reference sequence (RefSeq) database at NCBI: Current status, taxonomic expansion, and  
646 functional annotation. *Nucleic Acids Res.* 44:D733–D745.
- 647 Ocimati, W. D., Bouwmeester, H., Groot, J. C. J., Tittonell, P., Brown, D., and Blomme, G. 2019.  
648 The risk posed by Xanthomonas wilt disease of banana : Mapping of disease hotspots , fronts  
649 and vulnerable landscapes. *PLoS One.* 14:1–19.
- 650 Ocimati, W., Ssekiwoko, F., Karamura, E., Tinzaara, W., and Eden-green, S. 2013. Systemicity  
651 of Xanthomonas campestris pv . musacearum and time to disease expression after  
652 inflorescence infection in East African highland and Pisang Awak bananas in Uganda. *Plant  
653 Pathol.* 62:777–785.
- 654 OpenStreetMap contributors. 2015. *OSM. Planet dump \$DATE*.
- 655 Ott, A., Liu, S., Schnable, J. C., Yeh, C. T., Wang, K. S., and Schnable, P. S. 2017.  
656 tGBS@genotyping-by-sequencing enables reliable genotyping of heterozygous loci. *Nucleic  
657 Acids Res.* 45.
- 658 Pateiro-lopez, M. B. 2019. Package 'alphahull.'
- 659 Pironon, S., Etherington, T. R., Borrell, J. S., Kuhn, N., Macias-Fauria, M., Ondo, I., et al. 2019.  
660 Potential adaptive strategies for 29 Sub-Saharan crops under future climate change. *Nat. Clim.  
661 Chang.* 9:758–763.
- 662 Quimio, A. J. 1992. *Annual report of the plant pathologist: July 17, 1991- July 16, 1992. Enset  
663 Team Support Project. Sidamo Gamo-Goffa Peasant agricultural Development Program.*
- 664 Quimio, A. J. 1991. *First quarter report of the plant pathologists: July 1- September 30, 1991.  
665 Enset Team Support Project. Sidamo Gamo Goffa Peasant agricultural Development Program.  
666 PADEP III.*
- 667 Quimio, A. J., Mesfin, T., and Tessera, M. 1996. Diseases of Enset. In *In: Tsedeke A., Hiebsch,  
668 C., Brandt, S.A., Seifu G.M. (Eds.), pp. 188-203. Enset-Based Sustainable Agriculture in  
669 Ethiopia. Proceedings of the International Work shop on enset. Addis Ababa, Ethiopia, 13-20  
670 December 1993.*, eds. A. Tsedeke, H. Clifton, S.A. Brandt, and G. Seifu. Addis Ababa, Ethiopia,  
671 p. 188–203.
- 672 R Core team. 2019. *R: A language and environment for statistical computing.* Vienna, Austria: R  
673 Foundation for Statistical Computing.
- 674 Sahle, M., Yeshitela, K., and Saito, O. 2018. Mapping the supply and demand of Enset crop to  
675 improve food security in Southern Ethiopia. *Agron. Sustain. Dev.* 38:7 Available at:  
676 <http://link.springer.com/10.1007/s13593-017-0484-0>.

- 677 Salter, S. J., Cox, M. J., Turek, E. M., Calus, S. T., Cookson, W. O., Moffatt, M. F., et al. 2014.  
678 Reagent and laboratory contamination can critically impact sequence-based microbiome  
679 analyses. :1–12.
- 680 Savary, S., Ficke, A., Aubertot, J., and Hollier, C. 2012. Crop losses due to diseases and their  
681 implications for global food production losses and food security. *Food Secur.* :519–537.
- 682 Savary, S., Willocquet, L., Pethybridge, S. J., Esker, P., Mcroberts, N., and Nelson, A. 2019.  
683 The global burden of pathogens and pests on major food crops. *Nat. Ecol. Evol.* 3:430–439  
684 Available at: <http://dx.doi.org/10.1038/s41559-018-0793-y>.
- 685 Shank, R., and Ertiro, C. 1996. *A Linear Model for Predicting Enset Plant Yield and Assessment*  
686 *of Kocho Production in Ethiopia*. Addis Ababa.
- 687 Shimelash, D., Alemu, T., Addis, T., Turyagyenda, F. L., and Blomme, G. 2008. Banana  
688 Xanthomonas Wilt in Ethiopia: Occurrence and Insect Vector Transmission. *African Crop Sci. J.*  
689 16:75–87.
- 690 Shimwela, M. M., Ploetz, R. C., Beed, F. D., Jones, J. B., Blackburn, J. K., Mkulila, S. I., et al.  
691 2016. Banana xanthomonas wilt continues to spread in Tanzania despite an intensive  
692 symptomatic plant removal campaign: an impending socio-economic and ecological disaster.  
693 *Food Secur.* 8:939–951 Available at: <http://dx.doi.org/10.1007/s12571-016-0609-3>.
- 694 Spring, A. 1996. *Enset farming systems in southern region, ethiopia: Report on a rapid rural*  
695 *appraisal in Gurage, Hadiya, and Sidama Zones*.
- 696 Studholme, D. J., Wicker, E., Abrare, S. M., Aspin, A., Bogdanove, A., Broders, K., et al. 2019.  
697 Transfer of *Xanthomonas campestris* pv . *arecae* and *X* . *campestris* pv . *musacearum* to *X* .  
698 *vasicola* ( *Vauterin* ) as *X* . *vasicola* pv . *arecae*. *Phytopathology.* :1–8.
- 699 Tadesse, M., Babosha, K., Diro, M., and Wolde-Michael, G. 2003. Enset bacterial wilt sanitary  
700 control in Gurage Zone. :23.
- 701 Tamrat, S., Borrell, J. S., Biswas, M. K., Gashu, D., Wondimu, T., and Carlos, A. 2020.  
702 Micronutrient composition and microbial community analysis across diverse landraces of the  
703 Ethiopian orphan crop enset. *BioRxiv*.
- 704 Tessera, M., and Quimio, A. J. J. 1994. Research on enset pathology. In *Proceedings of the*  
705 *2nd National Horticultural Workshop of Ethiopia*, eds. E Herath and L Desalegn. Institute of  
706 Agricultural Research, Addis Ababa.: IAR, p. 217–225.
- 707 Tewodros, M., and Tesfaye, W. 2014. Farmers indigenous knowledge and assessment of enset  
708 (*Ensete ventricosum* Welw . Cheesman) cultivars for major insect pests in Ojojia water shade  
709 Kembata- tembaro zone, South Ethiopia. *Sky J. Agric. Res.* 3:112–119.
- 710 Title, P. O., and Bemmels, J. B. 2018. ENVIREM: an expanded set of bioclimatic and  
711 topographic variables increases flexibility and improves performance of ecological niche  
712 modeling. *Ecography (Cop.)*. 41:291–307.
- 713 Tushemereirwe, W. K., Okaasai, O. O., Kubiriba, J., Nankinga, C., Muhangi, J., Odoi, N., et al.  
714 2006. Status of banana bacterial wilt in Uganda. *African Crop Sci. J.* 14:73–82.
- 715 Uwamahoro, F., Berlin, A., Bylund, H., Bucagu, C., and Yuen, J. 2019. Management strategies  
716 for banana *Xanthomonas* wilt in Rwanda include mixing indigenous and improved cultivars.  
717 *Agron. Sustain. Dev.* 39.

- 718 Vurro, M., Bonciani, B., and Vannacci, G. 2010. Emerging infectious diseases of crop plants in  
719 developing countries: impact on agriculture and socio-economic consequences. *Food Secur.*  
720 2:113–132 Available at: <https://doi.org/10.1007/s12571-010-0062-7>.
- 721 Wasukira, A., Tayebwa, J., Thwaites, R., Paszkiewicz, K., Aritua, V., Kubiriba, J., et al. 2012.  
722 Genome-Wide Sequencing Reveals Two Major Sub-Lineages in the Genetically Monomorphic  
723 Pathogen *Xanthomonas Campestris* Pathovar *Musacearum*. *Genes (Basel)*. 3:361–377.
- 724 Welde-Michael, G., Bobosha, K., Addis, T., Blomme, G., Mekonnen, S., and Mengesha, T.  
725 2008. Mechanical transmission and survival of bacterial wilt on enset. *African Crop Sci. J.*  
726 16:97–102.
- 727 Welde-Michael, G., Bobosha, K., Blomme, G., Addis, T., Mengesha, T., Mekonnen, S., et al.  
728 2008. Evaluation of enset clones against enset bacterial wilt. *African Crop Sci. J.* 16:89–95.
- 729 Wolde, M., Ayalew, A., and Chala, A. 2016. Assessment of bacterial wilt (*Xanthomonas*  
730 *campestris* pv . *musacearum*) of enset in Southern Ethiopia. *African J. Agric. Res.* 11:1724–  
731 1733.
- 732 Yemataw, Z., Mekonen, A., Chala, A., Tesfaye, K., Mekonen, K., Studholme, D. J., et al. 2017.  
733 Farmers' knowledge and perception of enset *Xanthomonas* wilt in southern Ethiopia. *Agric.*  
734 *Food Secur.* 6:1–12 Available at: <https://doi.org/10.1186/s40066-017-0146-0>.
- 735 Yemataw, Z., Tesfaye, K., Zeberga, A., and Blomme, G. 2016. Exploiting indigenous knowledge  
736 of subsistence farmers' for the management and conservation of Enset (*Ensete ventricosum*  
737 (Welw.) Cheesman) (*musaceae* family) diversity on-farm. *J. Ethnobiol. Ethnomed.* 12:34  
738 Available at: <http://ethnobiomed.biomedcentral.com/articles/10.1186/s13002-016-0109-8>.
- 739 Yirgou, D., and Bradbury, J. F. 1968. Bacterial wilt of enset (*Ensete ventricosum*) incited by  
740 *Xanthomonas musacearum* sp. n. *Phytopathology*. 58:111–112.
- 741 Yirgu, T. 2016. Land use Dynamics and challenges of Enset ( *Ensete ventricosum* ) agriculture  
742 in the upper reaches of Baso-Deme watershed , Gamo Highland, SW Ethiopia. *Glob. J.*  
743 *Interdiscip. Soc. Sci.* 5:20–28.
- 744 Zerfu, A., Gebre, S. L., Berecha, G., and Getahun, K. 2018. Assessment of spatial distribution of  
745 enset plant diversity and enset bacteria wilt using geostatistical techniques in Yem special  
746 district, Southern Ethiopia. *Environ. Syst. Res.* 7:23 Available at:  
747 <https://environmentalsystemsresearch.springeropen.com/articles/10.1186/s40068-018-0126-9>.
- 748
- 749
- 750
- 751
- 752
- 753
- 754
- 755
- 756

757 **Tables**

758 **Table 1.** Reported pests and pathogens of domesticated enset (*Ensete ventricosum*) in  
759 Ethiopia.

| Disease                             | Known causal organism                                                        | Severity and impact                                                                            | Management advice available                                                                           | References                                                       |
|-------------------------------------|------------------------------------------------------------------------------|------------------------------------------------------------------------------------------------|-------------------------------------------------------------------------------------------------------|------------------------------------------------------------------|
| Enset Bacterial Wilt (EXW)          | <i>Xanthomonas vasicolapv. musacearum</i> (Xvm)                              | Considered the most important disease of enset. Potential for complete crop loss.              | Sanitary Measures                                                                                     | Yirgou and Bradbury (1968)                                       |
| Bacterial corm rot                  | Unidentified bacterium, potentially <i>Erwinia</i> or <i>Dickeya</i> species | Not known. Potential for loss of individual whole plants                                       | Not available                                                                                         | Quimio et al. (1996)                                             |
| Sheath rot of enset                 | Unidentified                                                                 | Not known. Potential for loss of individual whole plants.                                      | Not available                                                                                         | Quimio (1991)                                                    |
| Leaf spot                           | <i>Phyllostica</i> sp., <i>Pyricularia</i> sp., and <i>Drechslera</i> sp     | Not known                                                                                      | Not available                                                                                         | Quimio et al. (1996)                                             |
| Leaf spot                           | <i>Cladosporium</i> Sp. and <i>Deightonella</i> Sp.                          | Not known                                                                                      | Not available                                                                                         | Quimio et al. (1996)                                             |
| Sigatoka                            | <i>Mycosphaerella musicola</i>                                               | Not known                                                                                      | Not available, but potentially available from Banana.                                                 | Quimio et al. (1996)                                             |
| <i>Sclerotium</i> wilt and root rot | <i>Sclerotium rolfsi</i>                                                     | Not known                                                                                      | Not available                                                                                         | (Quimio 1992)                                                    |
| Mosaic and chlorotic streak         | Unidentified                                                                 | Not known                                                                                      | Not available                                                                                         | (Quimio 1992, 1991)                                              |
| Root knot nematode                  | <i>Meloidogyne</i> sp.                                                       | Not known                                                                                      | Not available                                                                                         | (Tessera and Quimio 1994)                                        |
| Vertebrate pests                    | <i>Porcupine, mole rat, pigs, monkeys</i>                                    | Not known. Potential disease vector.                                                           | Cultural practices, traps                                                                             | Kefale and Stephen, (1991)                                       |
| Leaf hopper                         | <i>Sophonia</i> sp                                                           | Not known. Potential disease vector.                                                           | Not available                                                                                         | (Zerfu et al. 2018)                                              |
| Enset root mealybug                 | <i>Cataenococcus ensete</i>                                                  | Likely to be localised yield reductions due to retardation of growth. Potential disease vector | Integration of methods (boiling water treatments, cultural practices, botanicals, use of insecticide) | Lemawork et al. (2018); Addis, Azerefegne, Blomme, et al. (2008) |

\*We note that whilst in many cases 'Management advice' is not available or reported, there may nevertheless be local cultural practices that warrant further research and investigation

760 **Table 2.** Comparison of farmer perceived constraints and associated proportion of  
761 farms on which each pest or pathogen was recorded. Columns one and two denote the  
762 reported constraint; subsequent columns show the proportion of those farms in which  
763 each pest or pathogen was recorded.

| Farmer reported constraint | Number of reports* | Proportion of farms in which species was recorded |               |          |         |           |
|----------------------------|--------------------|---------------------------------------------------|---------------|----------|---------|-----------|
|                            |                    | EXW                                               | Root mealybug | Corm rot | Molerat | Porcupine |
| EXW                        | 265 (45.9%)        | 0.71                                              | 0.29          | 0.48     | 0.31    | 0.42      |
| Root mealybug              | 48 (8.3%)          | 0.15                                              | 0.98          | 0.31     | 0.13    | 0.38      |
| Corm rot                   | 87 (15.1%)         | 0.07                                              | 0.21          | 1.00     | 0.13    | 0.28      |
| Molerat                    | 49 (8.5%)          | 0.20                                              | 0.45          | 0.39     | 0.98    | 0.47      |
| Porcupine                  | 53 (9.2%)          | 0.17                                              | 0.23          | 0.47     | 0.26    | 0.98      |

\* Three additional respondents reported Wild pigs, one leaf blight and one leaf hopper.

764  
765  
766  
767  
768  
769  
770  
771  
772  
773  
774  
775  
776  
777  
778  
779

780 **Table 3.** Kendall rank correlation coefficient for each spatial variable and the PCA-  
781 derived distribution of each pest and pathogen.

| Spatial variables                | EXW    | Corm rot | Root mealybug | Molerat | Porcupine |
|----------------------------------|--------|----------|---------------|---------|-----------|
| Thornthwaite aridity index       | 0.038  | -0.039   | -0.010        | -0.090  | 0.007     |
| Precipitation of wettest week    | 0.014  | 0.020    | -0.055        | 0.022   | -0.091    |
| Precipitation of warmest quarter | -0.008 | 0.027    | -0.088        | 0.097   | -0.026    |
| Precipitation of coldest quarter | 0.016  | 0.030    | -0.129        | 0.035   | -0.078    |
| Mean diurnal temperature range   | 0.030  | -0.022   | 0.008         | -0.091  | 0.050     |
| Isothermality                    | -0.037 | 0.042    | -0.122        | 0.039   | -0.036    |
| Climatic Moisture Index          | 0.001  | 0.044    | -0.076        | 0.090   | -0.102    |
| continentality                   | 0.050  | -0.055   | 0.060         | -0.104  | 0.017     |
| Max Temp. Coldest                | -0.047 | -0.053   | 0.048         | -0.054  | 0.044     |
| PET Coldest Quarter              | -0.050 | -0.046   | 0.118         | -0.008  | 0.060     |
| PET Driest Quarter               | -0.010 | -0.044   | 0.124         | -0.075  | 0.054     |
| PET Wettest Quarter              | 0.030  | -0.080   | 0.068         | -0.105  | 0.021     |
| Topographic position Index       | 0.004  | -0.009   | -0.009        | -0.014  | 0.012     |
| Elevation                        | 0.032  | 0.039    | -0.030        | 0.048   | -0.029    |
| Distance to a major road         | 0.001  | 0.045    | 0.008         | 0.038   | -0.047    |

782

783

784

785

786

787

788

789

790

791

792



793 **Table 4.** Pairwise niche overlap across the five major enset pests and pathogens.  
794 Lower triangle indicates overlap at 10% prevalence quantile. Upper triangle indicates  
795 overlap at 90% prevalence quantile.

| Pests and pathogens | EXW  | Corm rot | Root mealybug | Molerat | Porcupine |
|---------------------|------|----------|---------------|---------|-----------|
| EXW                 | -    | 0.32     | 0.01          | 0.05    | 0.33      |
| Corm rot            | 0.96 | -        | 0.02          | 0.04    | 0.24      |
| Root mealybug       | 0.91 | 0.91     | -             | 0.00    | 0.20      |
| Molerat             | 0.84 | 0.85     | 0.91          | -       | 0.03      |
| Porcupine           | 0.96 | 0.96     | 0.94          | 0.87    | -         |

796

797

798

799

800

801

802

803

804

805

806

807

808

809

810

811

812

813

814

815

816 **Figures**

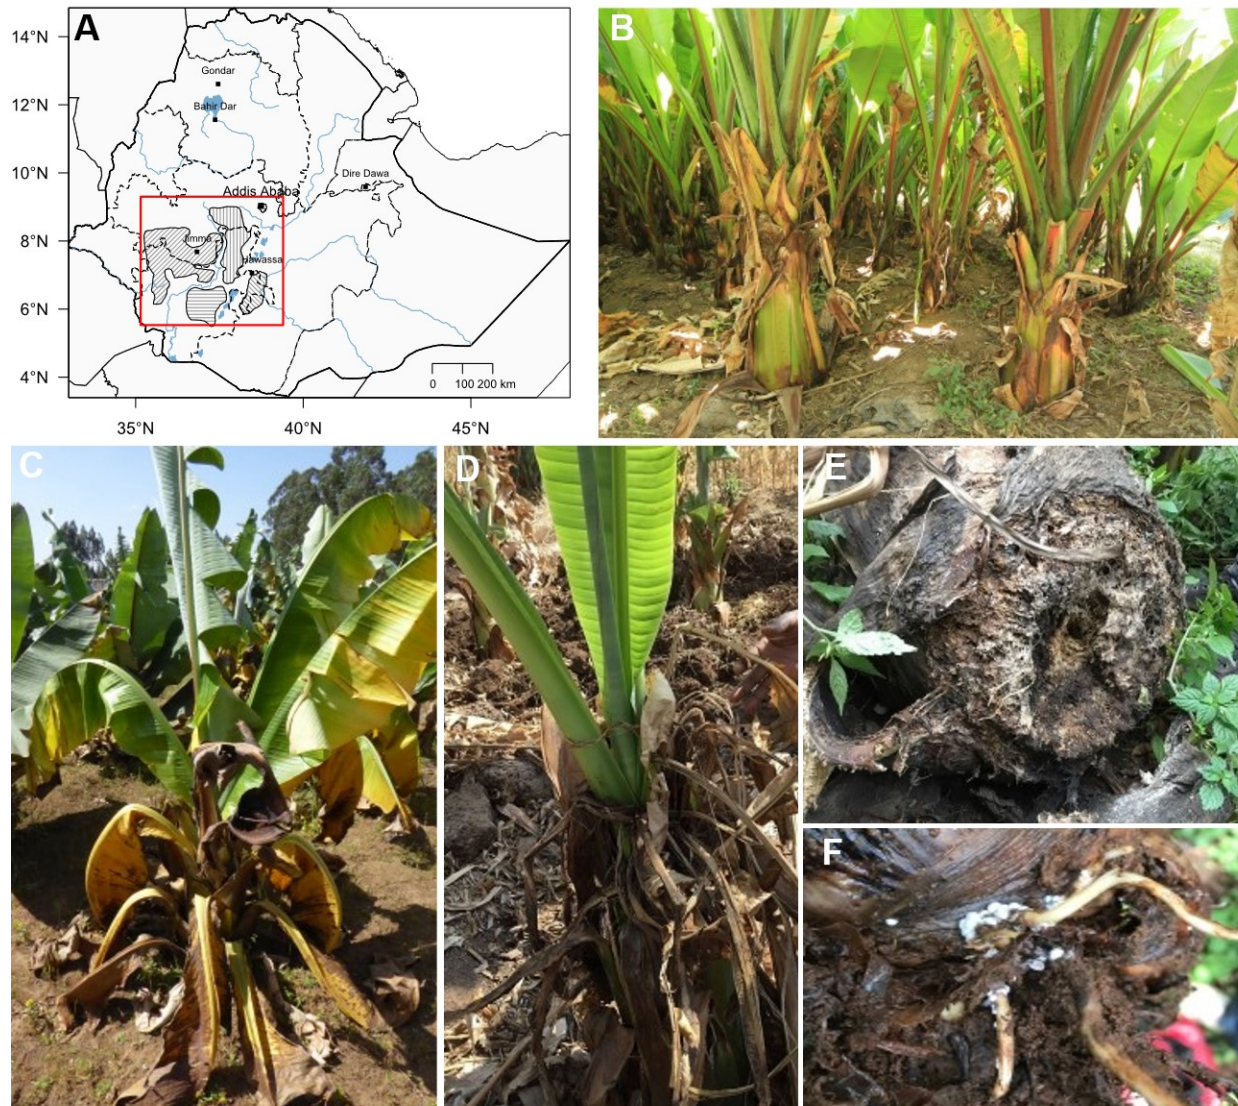

817 **Figure 1. Study area and major enset pests and pathogens in Ethiopia.** A) Map of  
818 Ethiopia, with shaded polygons denoting main regions of enset agriculture and red  
819 boundary indicating the extent of our study area. B) Typical enset plot. C) Enset with  
820 symptoms of Enset Xanthomonas Wilt (EXW). D) Enset of landrace 'Badadet'  
821 apparently recovering from severe EXW. E) Enset with evidence of corm rot. F) Root  
822 mealybugs on enset corm and roots.

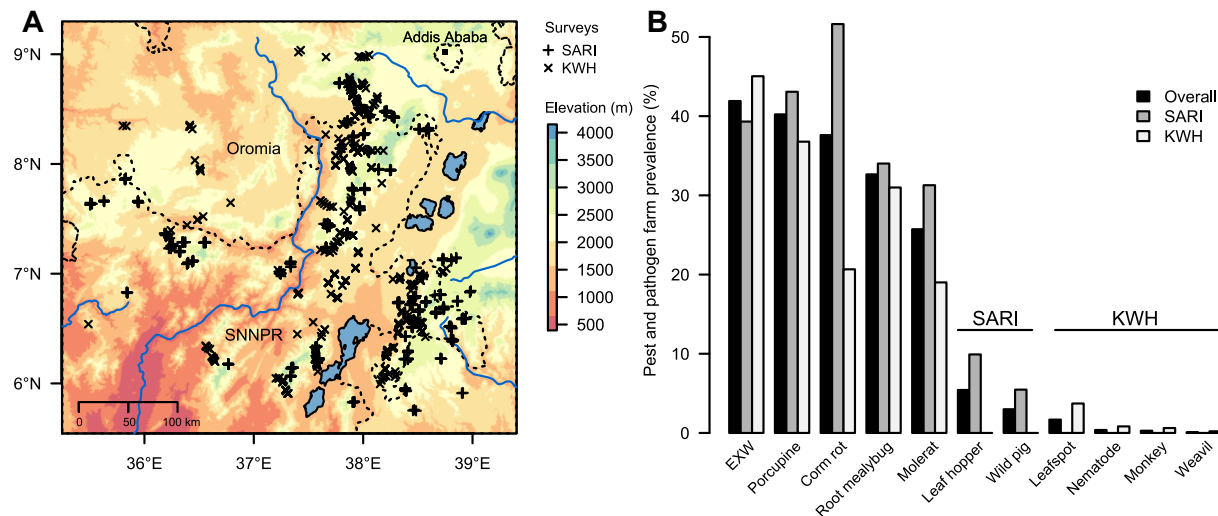

823

824 **Figure 2. Summary of enset pest and pathogen surveys.** A) Spatial distribution of

825 the two independent enset pest and pathogen surveys analysed in this study. B)

826 Percentage of farm surveys that recorded each of 11 enset pests and pathogens.

827

828

829

830

831

832

833

834

835

836

837

838

839

840

841

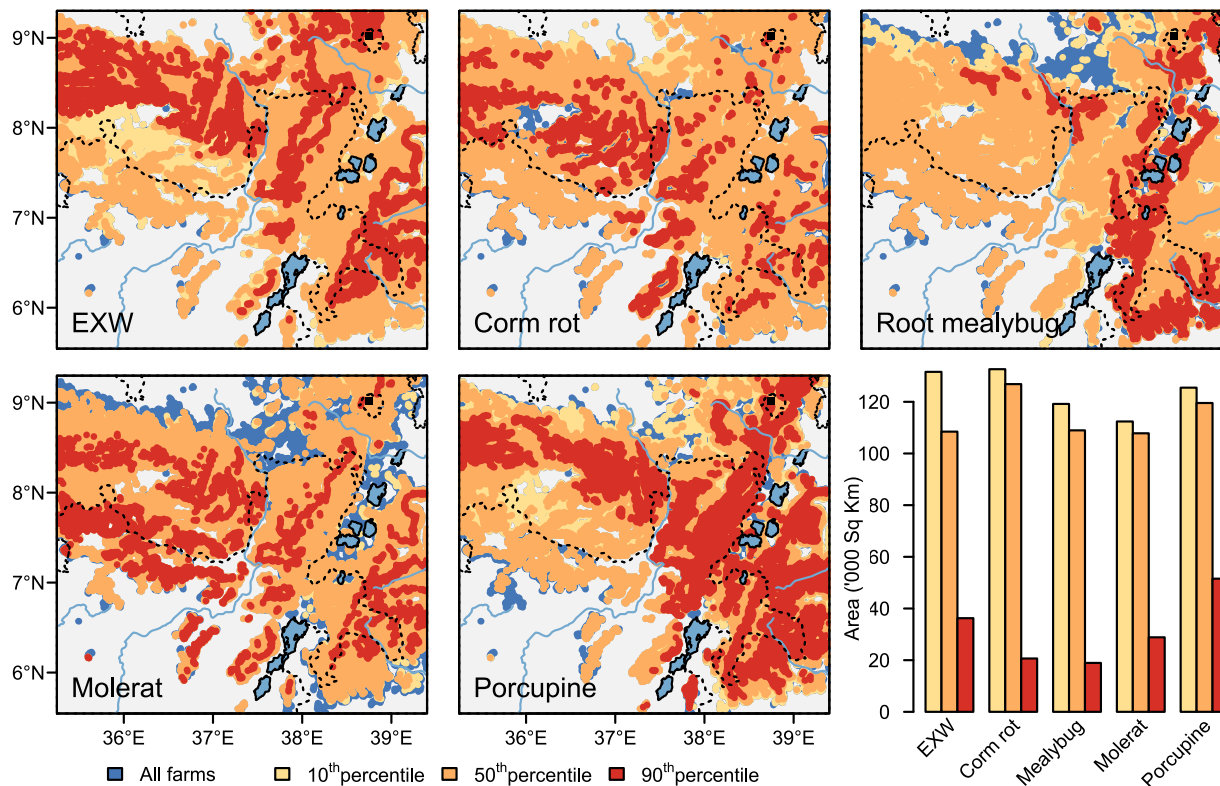

842

843 **Figure 3. Distribution maps of five major insect pests and pathogens.** Colour scales

844 depict quantiles of pest and pathogen prevalence in farm survey clusters. Bar chart

845 depicts the area ('000 km<sup>2</sup>) of pest and pathogen occurrence at each prevalence

846 quantile.

847

848

849

850

851

852

853

854

855

856

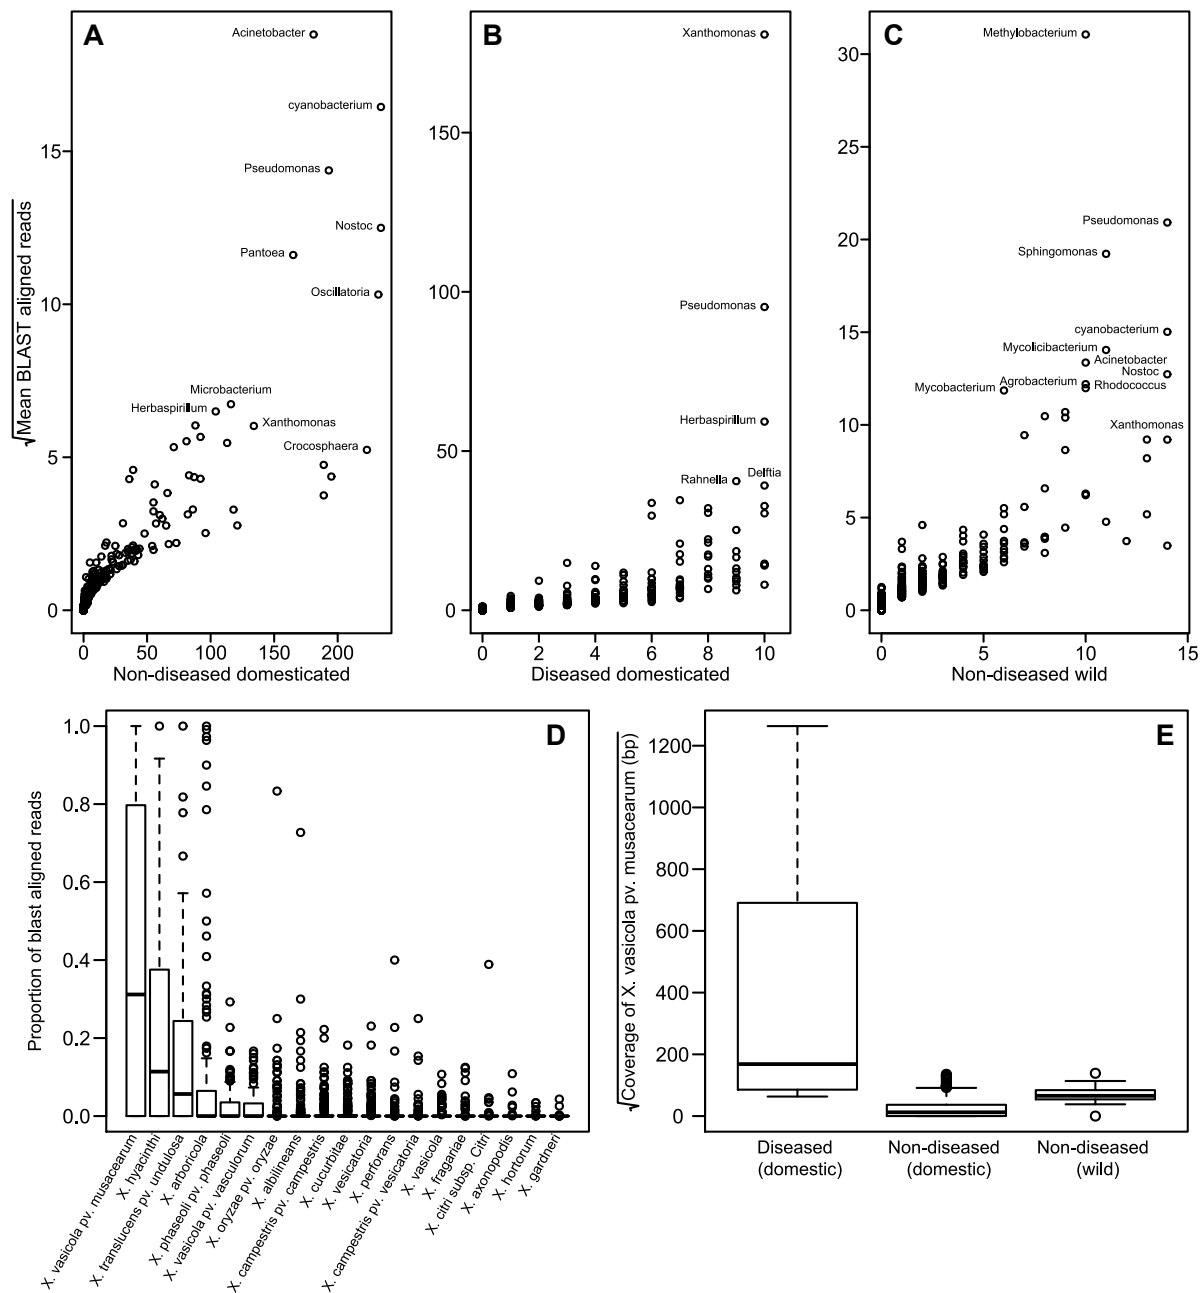

857  
858 **Figure 4. Enset leaf microbiome characterisation based on blast aligned raw**  
859 **genotyping-by-sequencing reads.** A-C) Microbial genera identified in diseased and  
860 non-diseased enset samples. D) Number of reads aligning to each of 19 *Xanthomonas*  
861 reference sequences. E) Total coverage of *Xanthomonas vasicola* pv. *musacearum*  
862 blast aligned reads for each enset sample, grouped by disease status and  
863 domestication.

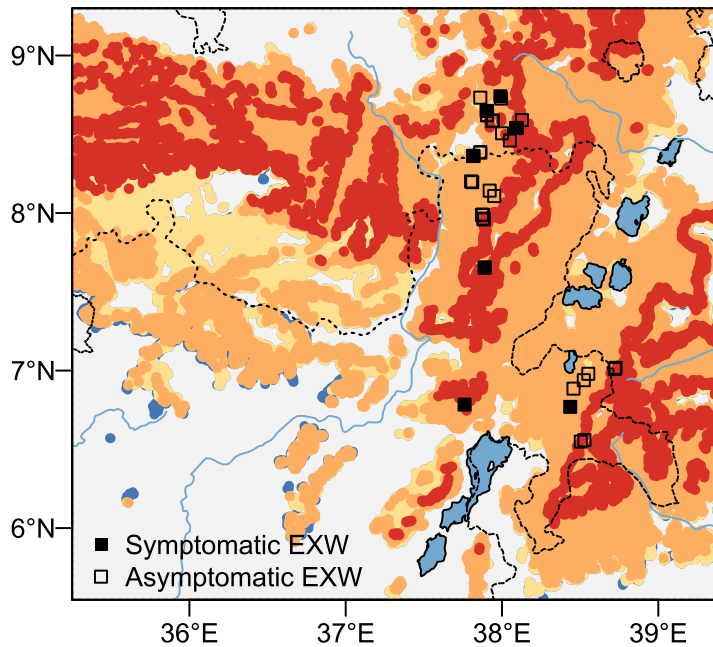

864

865 **Figure 5. Distribution of EXW symptomatic and asymptomatic onset samples in**

866 **south west Ethiopia.** Background map is modelled enset distribution (Figure 3). The

867 minimum *Xvm* read count in symptomatic samples was 4000. Here, we plot the 37

868 asymptomatic individuals with an equal or greater number of *Xvm* reads.

869

870
